# Supplementary material for: Successful Recovery of Nuclear Protein-Coding Genes from Small Insects in Museums Using Illumina Sequencing
Source: PubMed Central journal article supplement (PMC4696846; doi:10.1371/journal.pone.0143929), 2015-12-30

***Bembidion subfusum*** (2494)

64 years

Total DNA: 9.0 ng

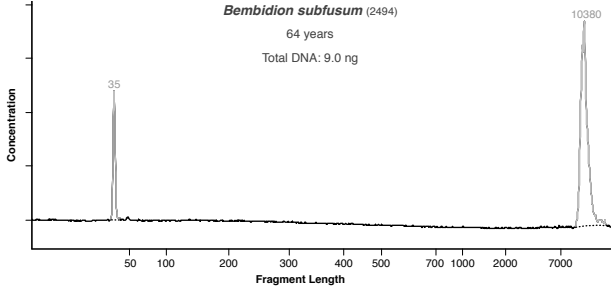

***Bembidion subfusum*** (1955)

60 years

Total DNA: 199 ng

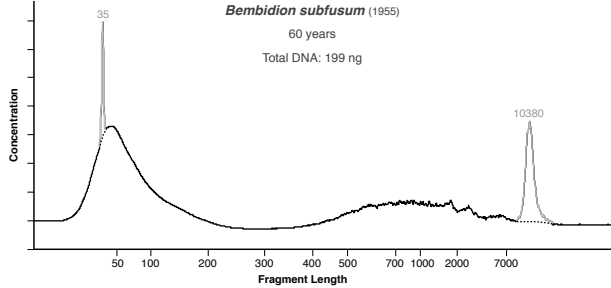

***Bembidarens*** (3973)

52 years

Total DNA: 22.4 ng

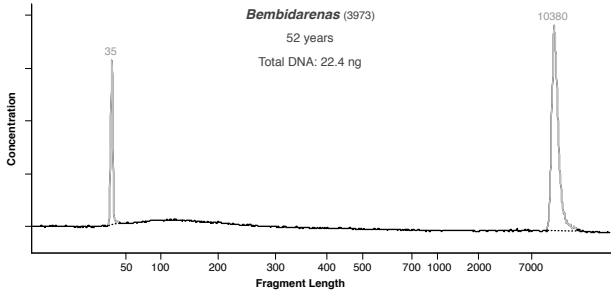

***Apteromimus platyderoides*** (3959)

46 years

Total DNA: 217 ng

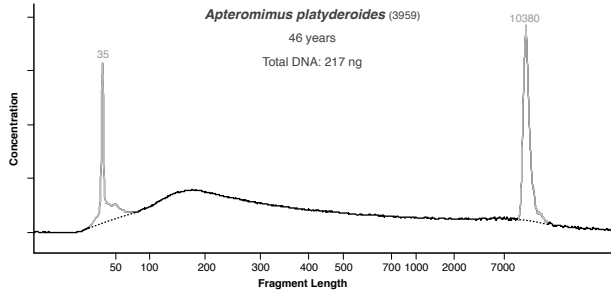

***Pseudophilochthus nubigena*** (3957)

46 years

Total DNA: 745 ng

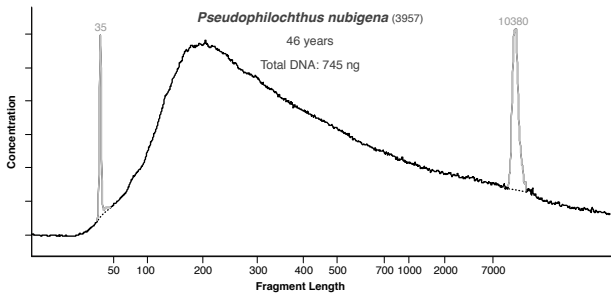

***Tachysbembix*** sp. (3908)

39 years

Total DNA: 42.7 ng

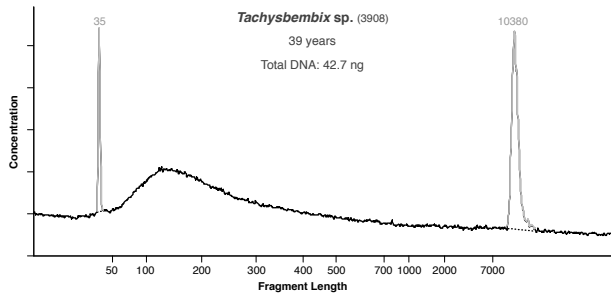

***Moirainpa amazona*** (3907)

37 years

Total DNA: <0.045 ng

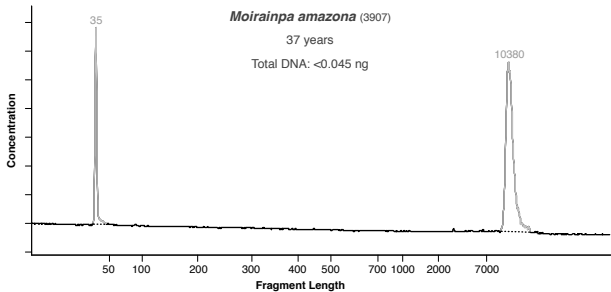

***Bembidion*** "Clearwater" (2907)

35 years

Total DNA: 437 ng

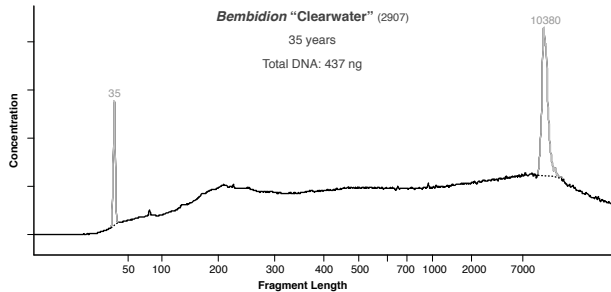

Supplement: pone.0143929.s001.pdf [file pone.0143929.s001.pdf]
