# Supplementary material for: Successful Recovery of Nuclear Protein-Coding Genes from Small Insects in Museums Using Illumina Sequencing
Source: PubMed Central journal article supplement (PMC4696846; doi:10.1371/journal.pone.0143929), 2015-12-30
Supplement: pone.0143929.s004.pdf [file pone.0143929.s004.pdf]

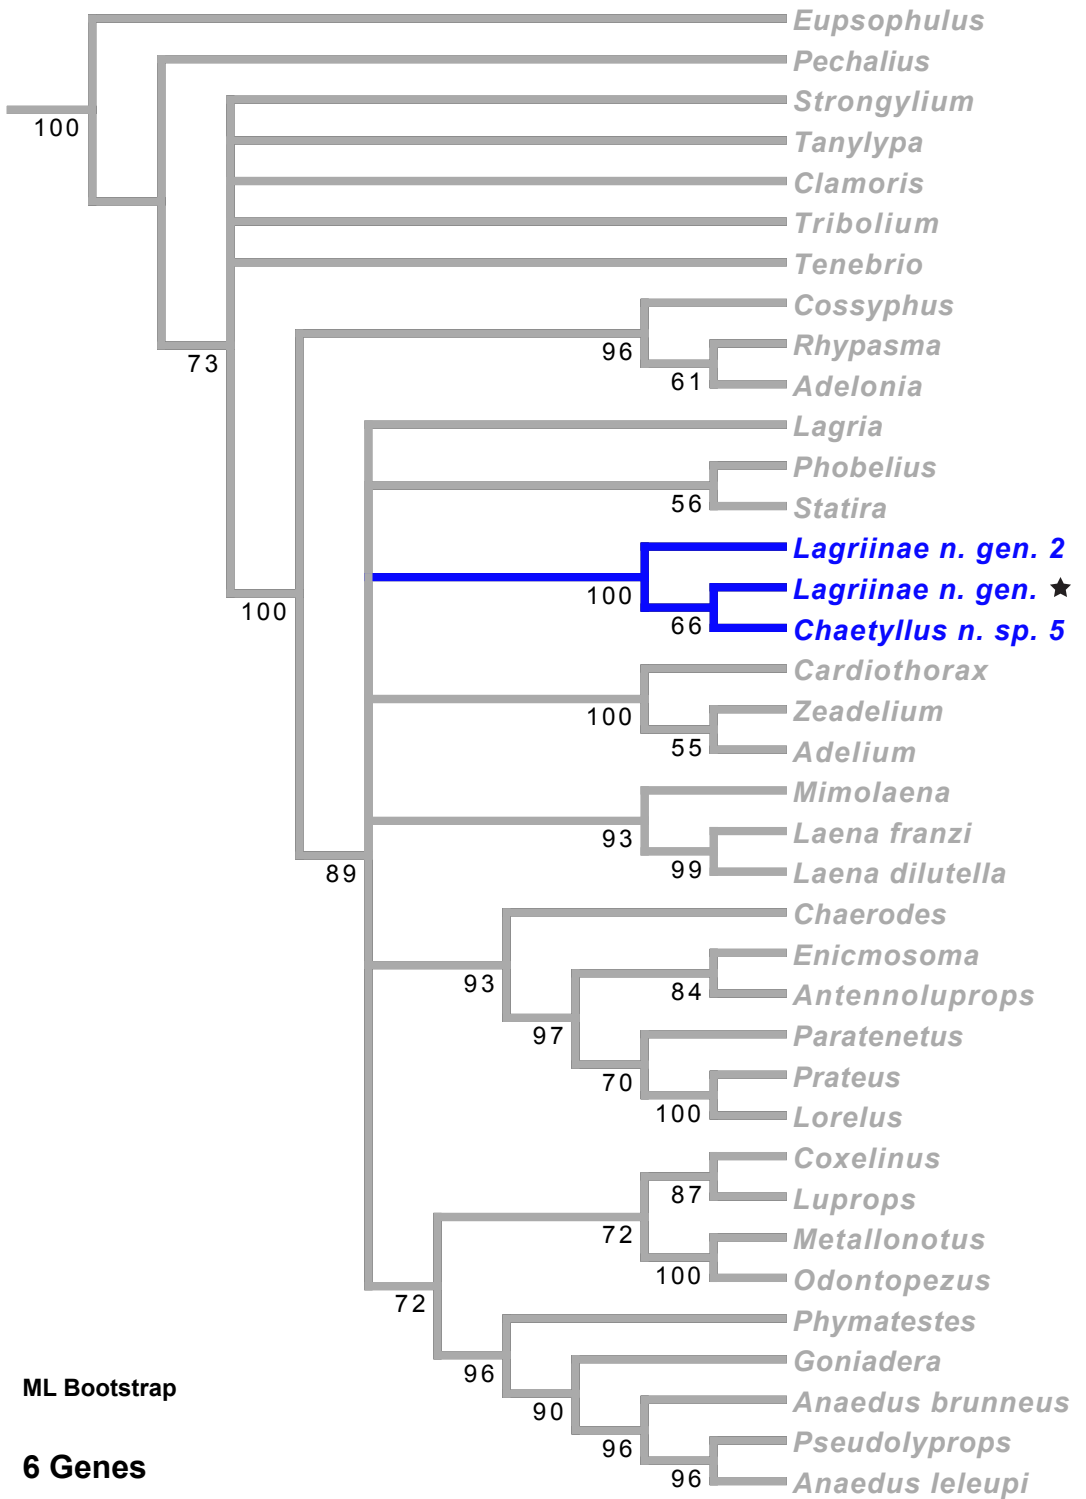

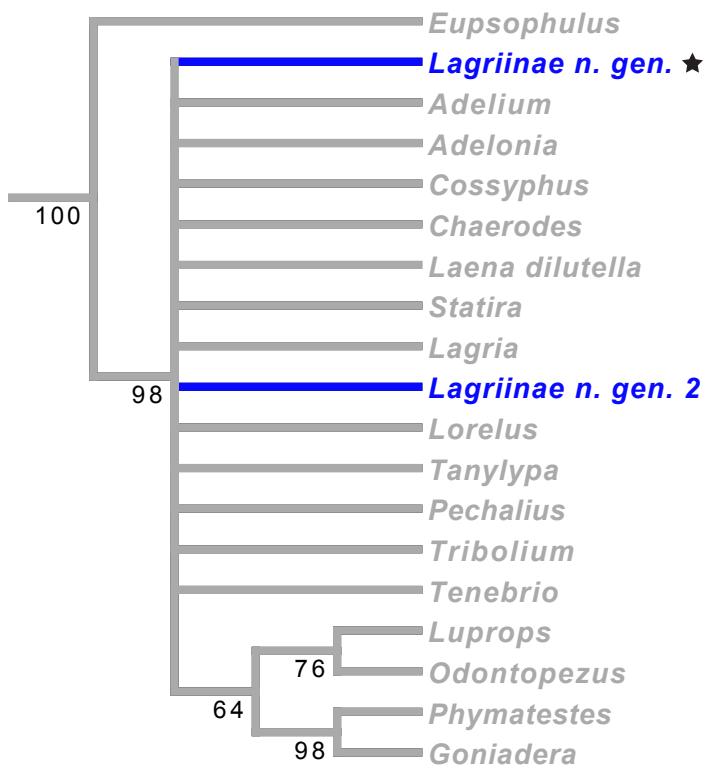

ML Bootstrap

18S

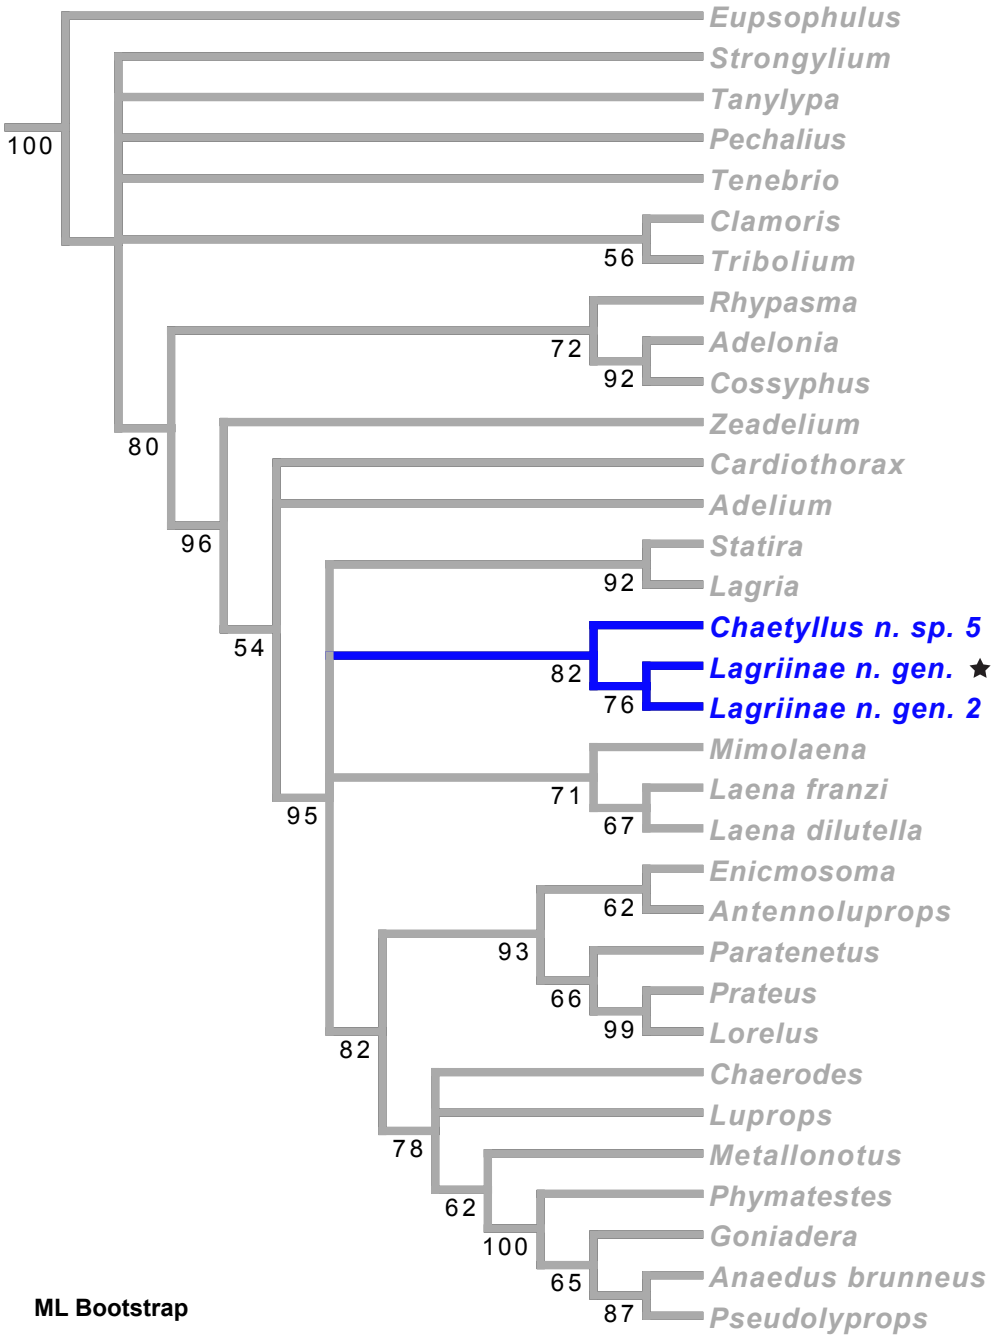

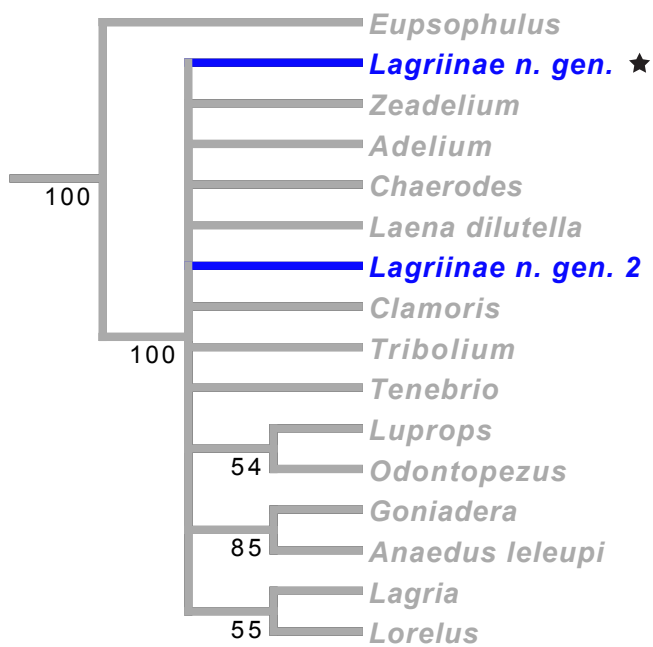

ML Bootstrap

COI

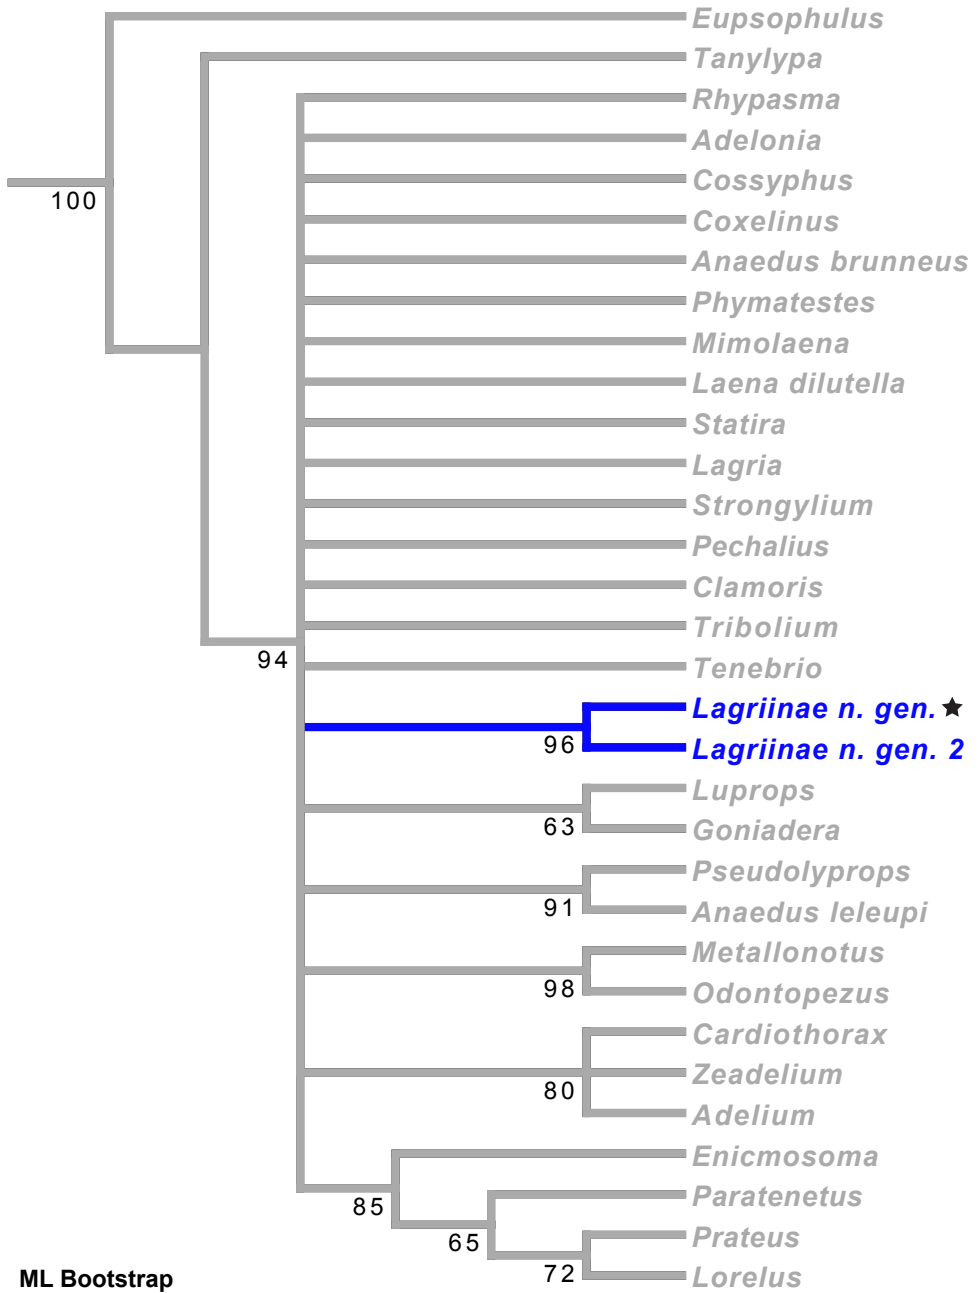

ML Bootstrap

ArgK

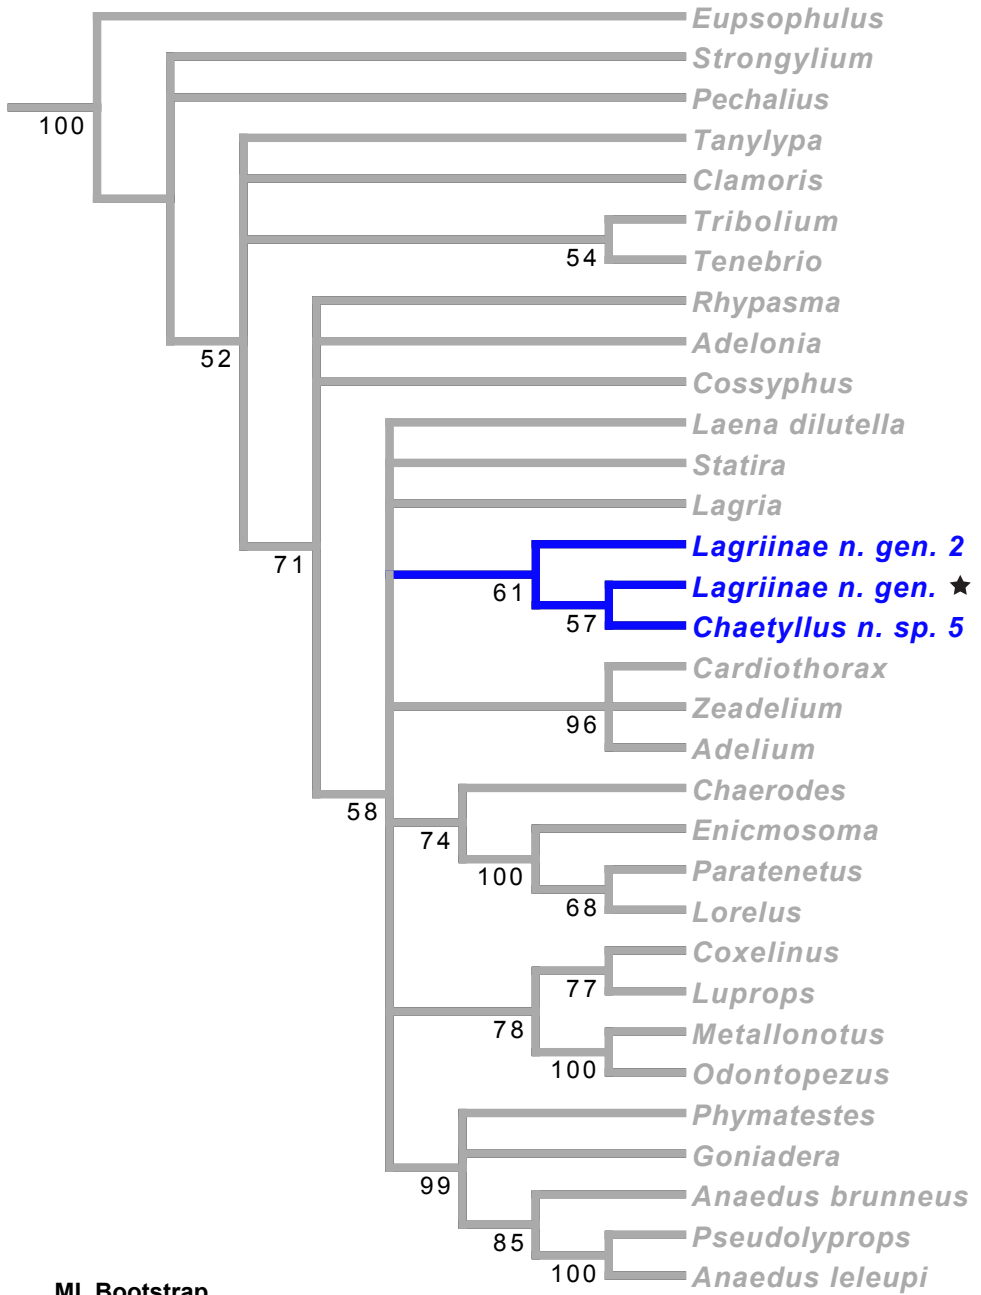

ML Bootstrap

CAD

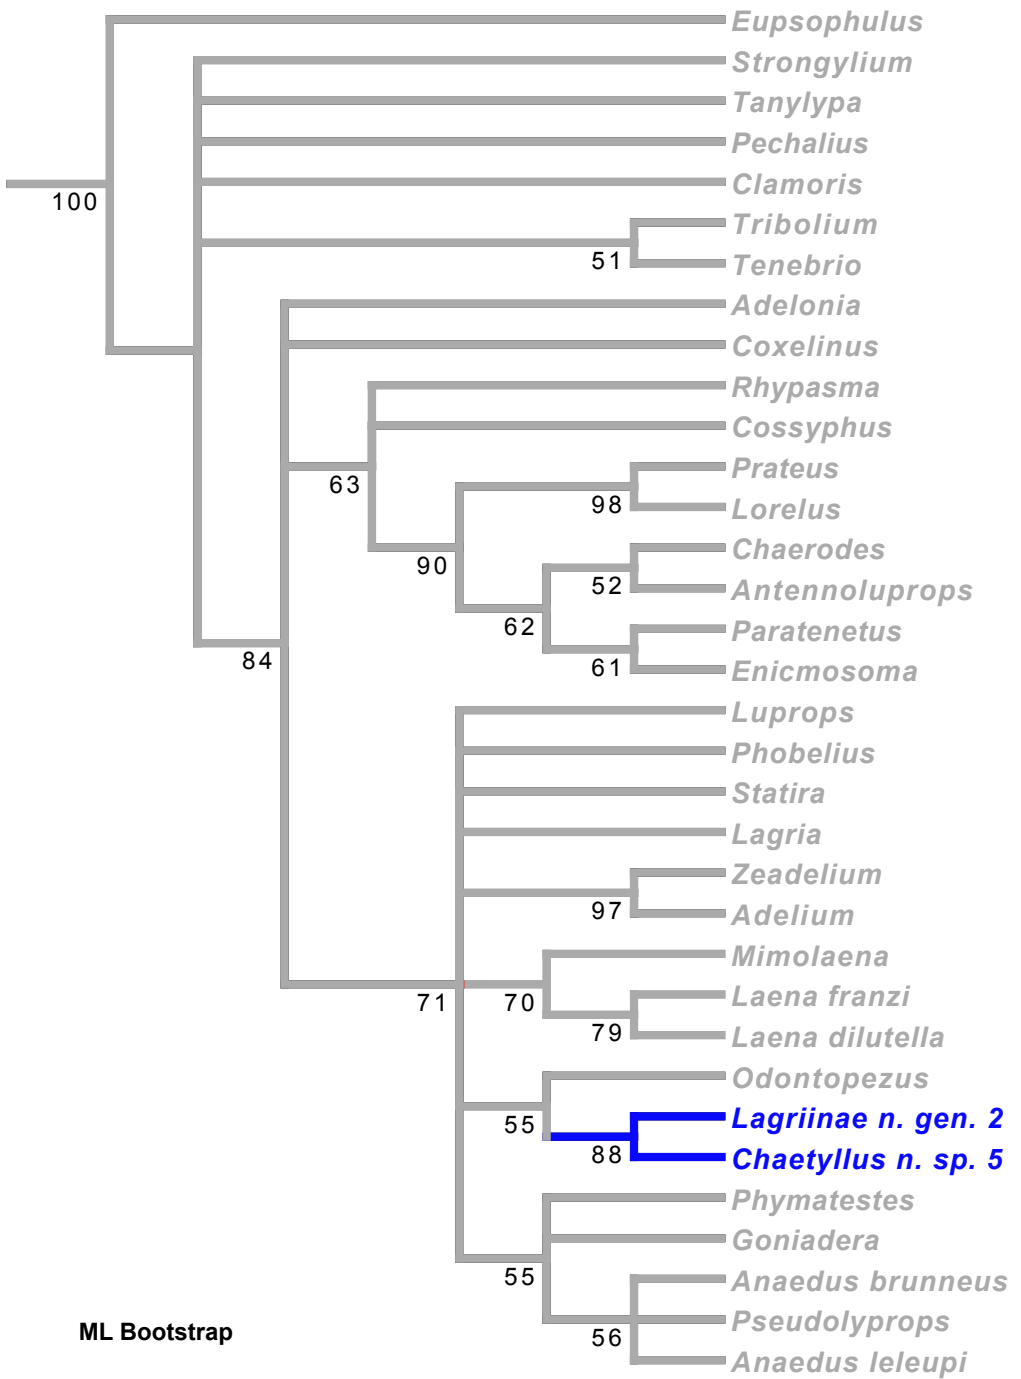

ML Bootstrap

**wg**
