# Supplementary material for: Successful Recovery of Nuclear Protein-Coding Genes from Small Insects in Museums Using Illumina Sequencing
Source: PubMed Central journal article supplement (PMC4696846; doi:10.1371/journal.pone.0143929), 2015-12-30
Supplement: pone.0143929.s005.pdf [file pone.0143929.s005.pdf]

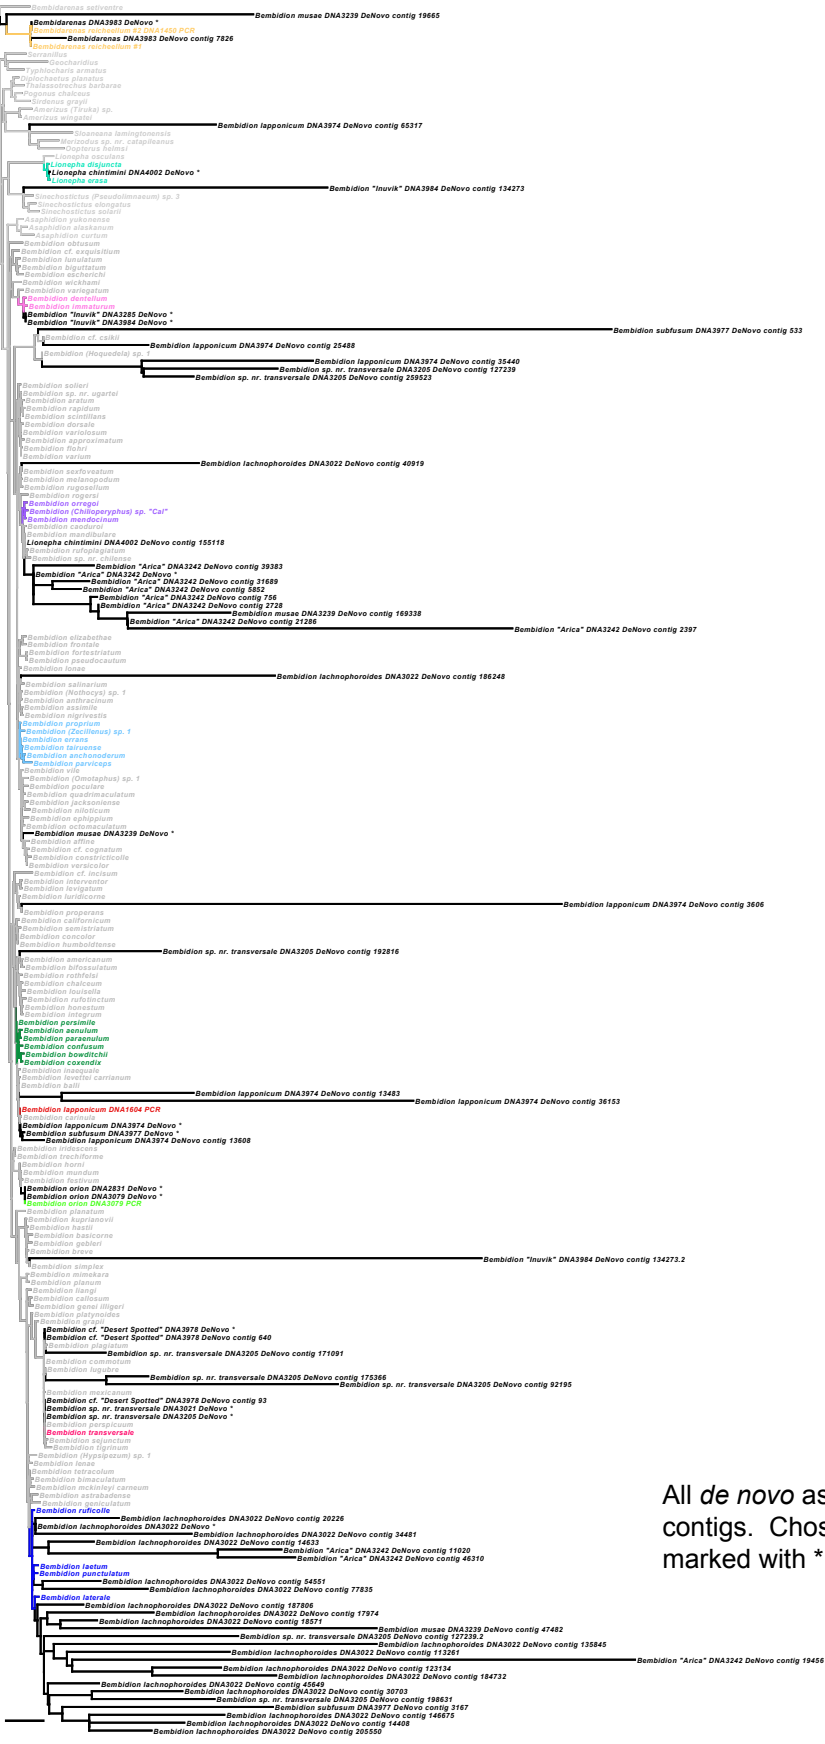

All de novo assembly contigs. Chosen de novo marked with \*

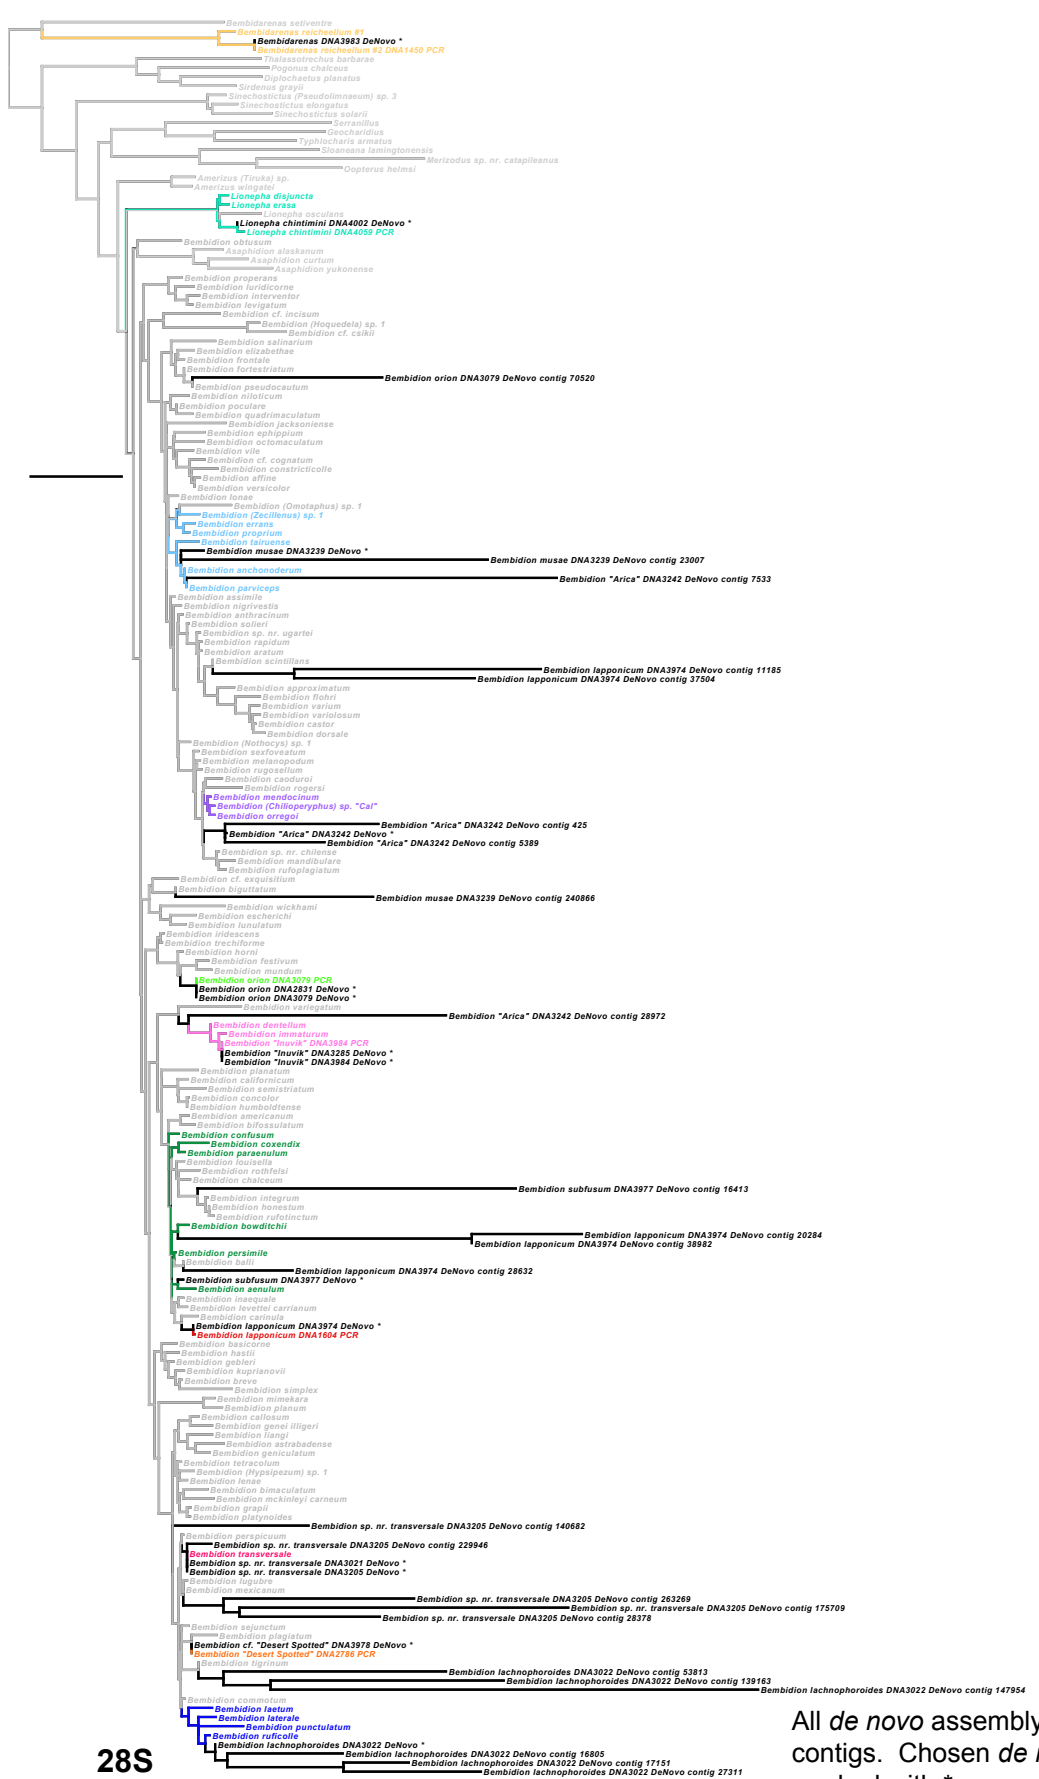

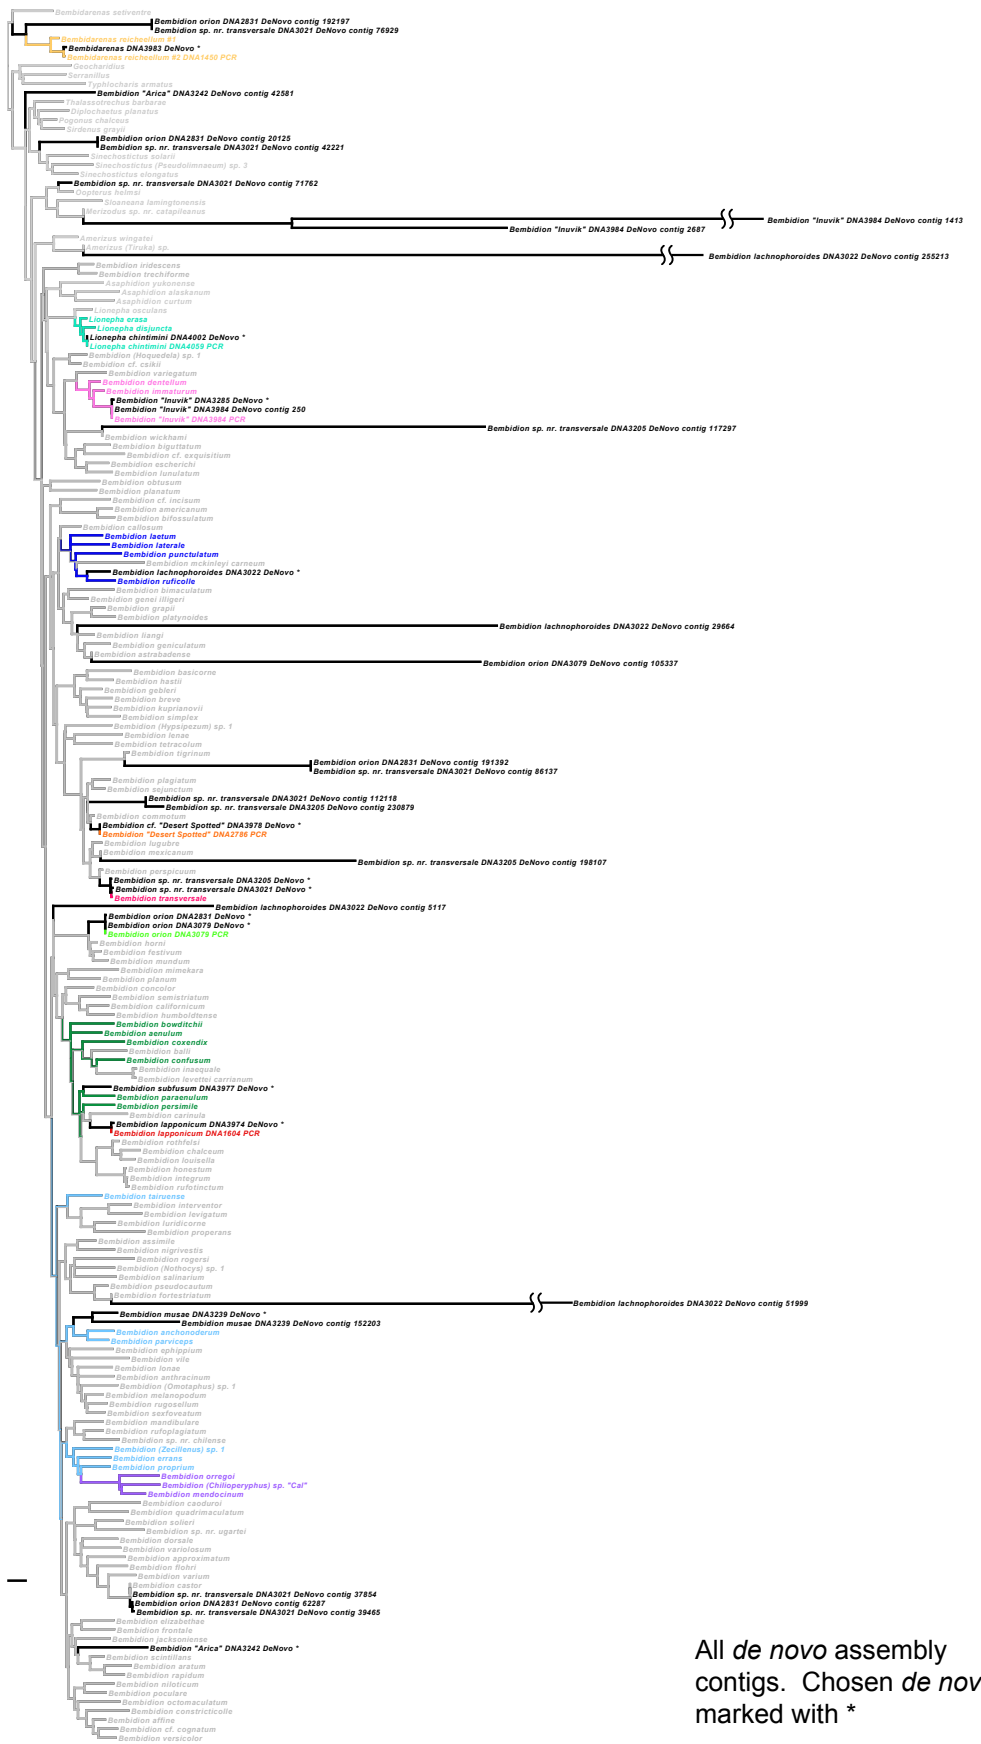

COI

All de novo assembly contigs. Chosen de novo marked with \*

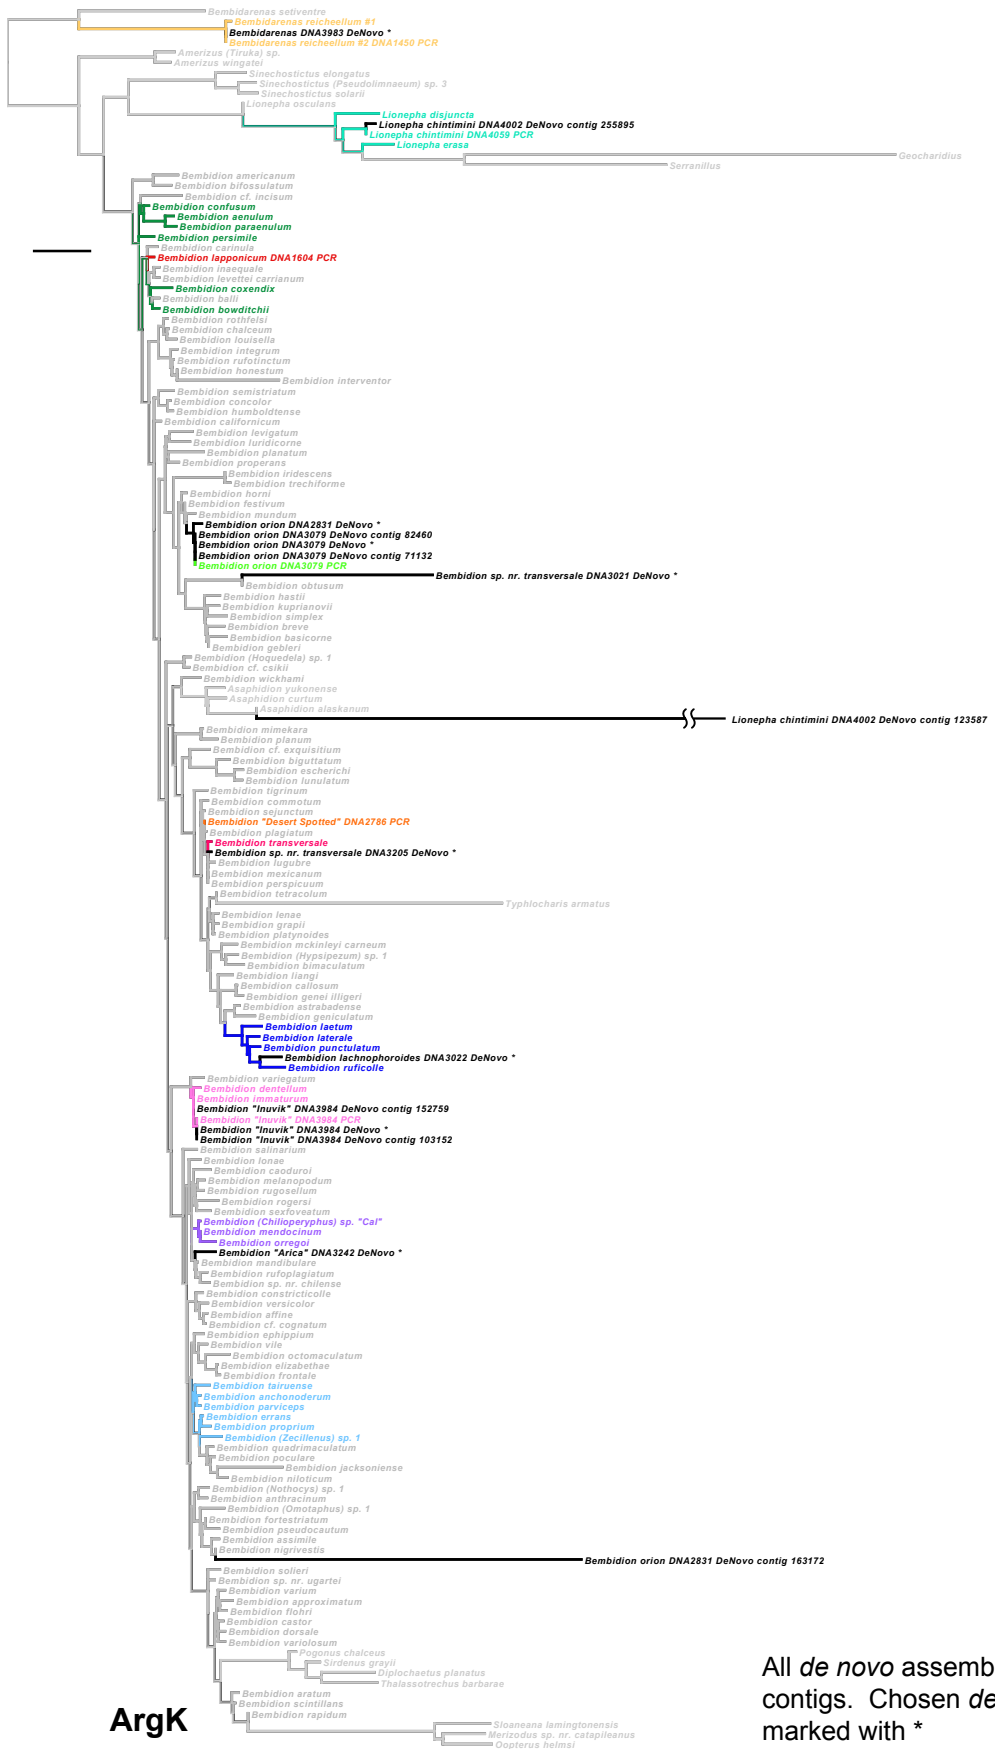

ArgK

All de novo assembly contigs. Chosen de novo marked with \*

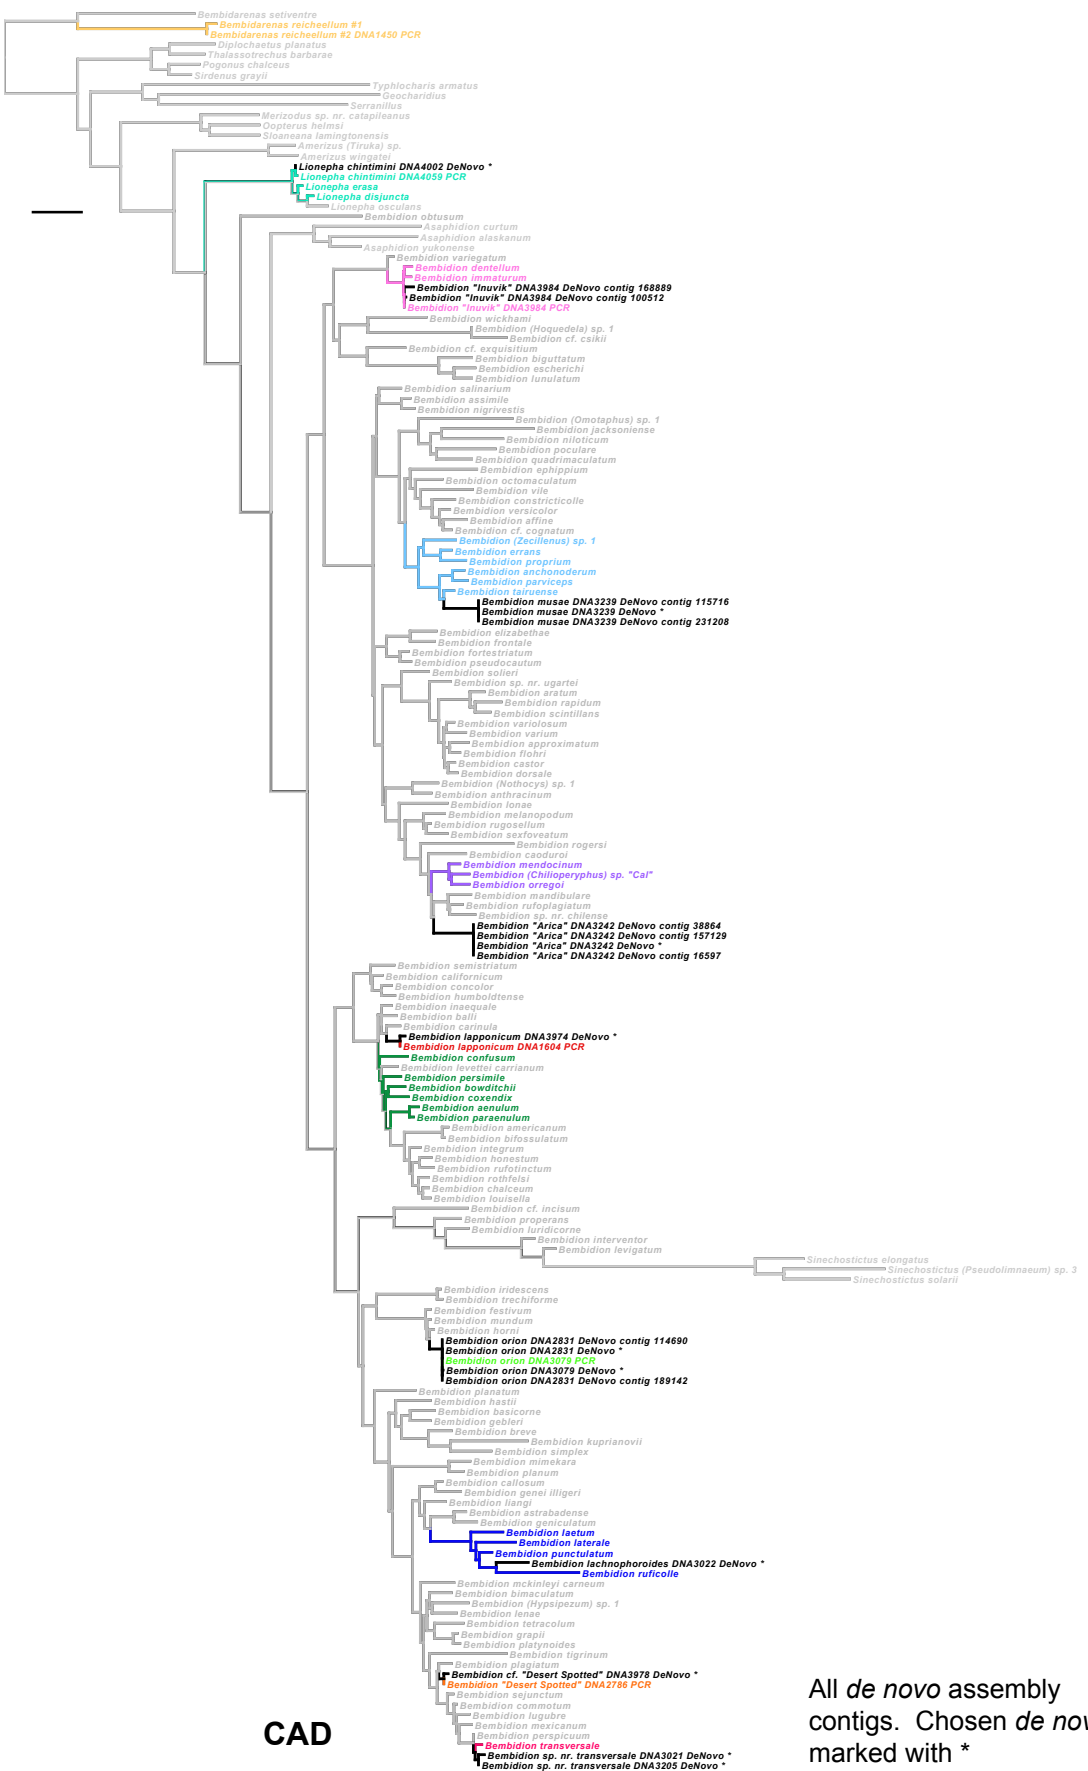

CAD

All de novo assembly contigs. Chosen de novo marked with \*

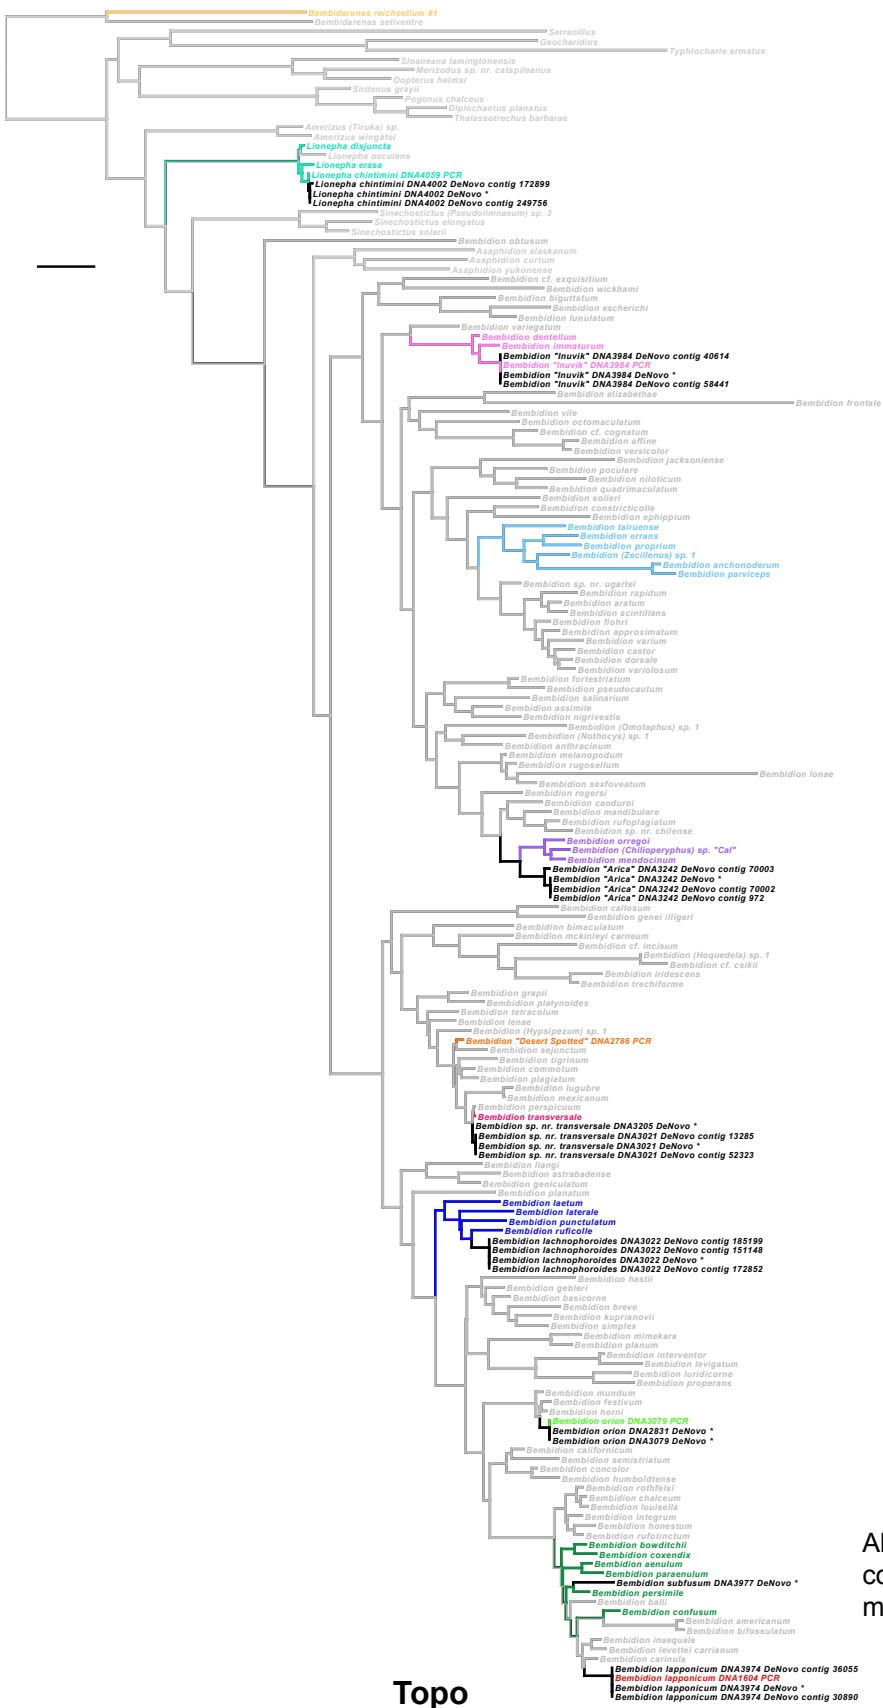

All de novo assembly contigs. Chosen de novo marked with \*

Topo

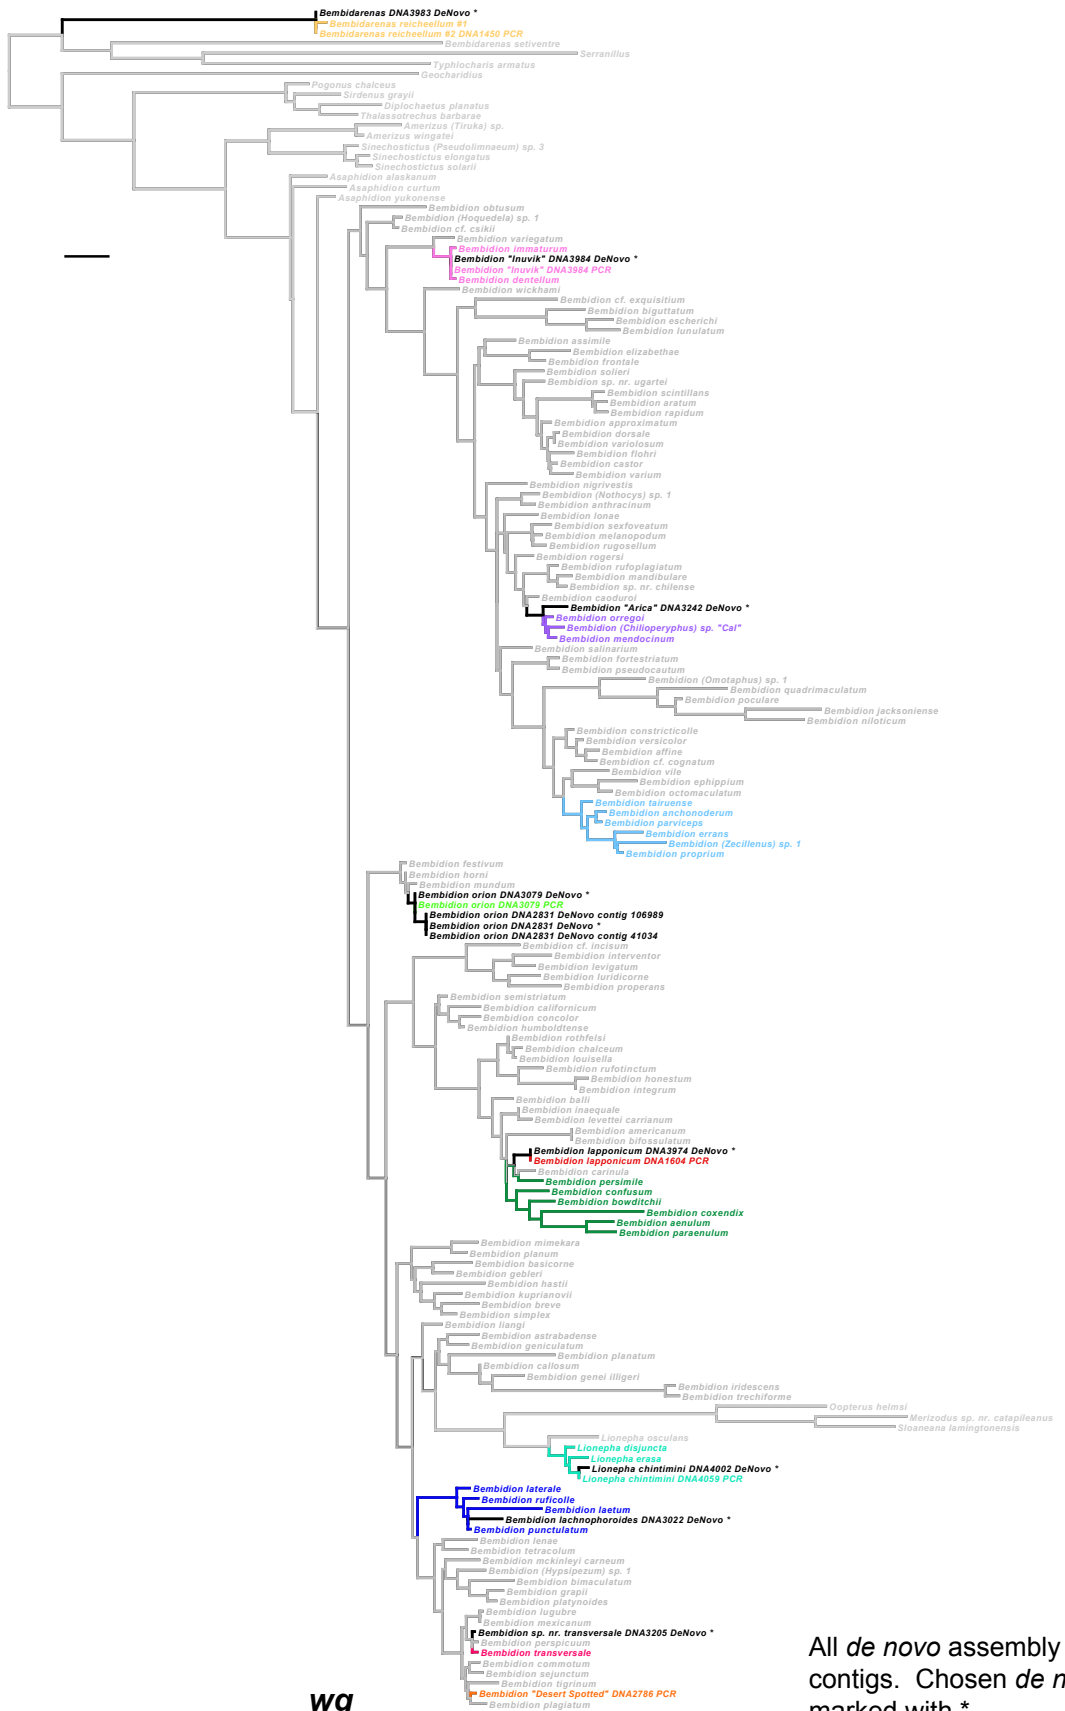

wg

All de novo assembly contigs. Chosen de novo marked with \*
