# Supplementary material for: Successful Recovery of Nuclear Protein-Coding Genes from Small Insects in Museums Using Illumina Sequencing
Source: PubMed Central journal article supplement (PMC4696846; doi:10.1371/journal.pone.0143929), 2015-12-30
Supplement: pone.0143929.s007.pdf [file pone.0143929.s007.pdf]

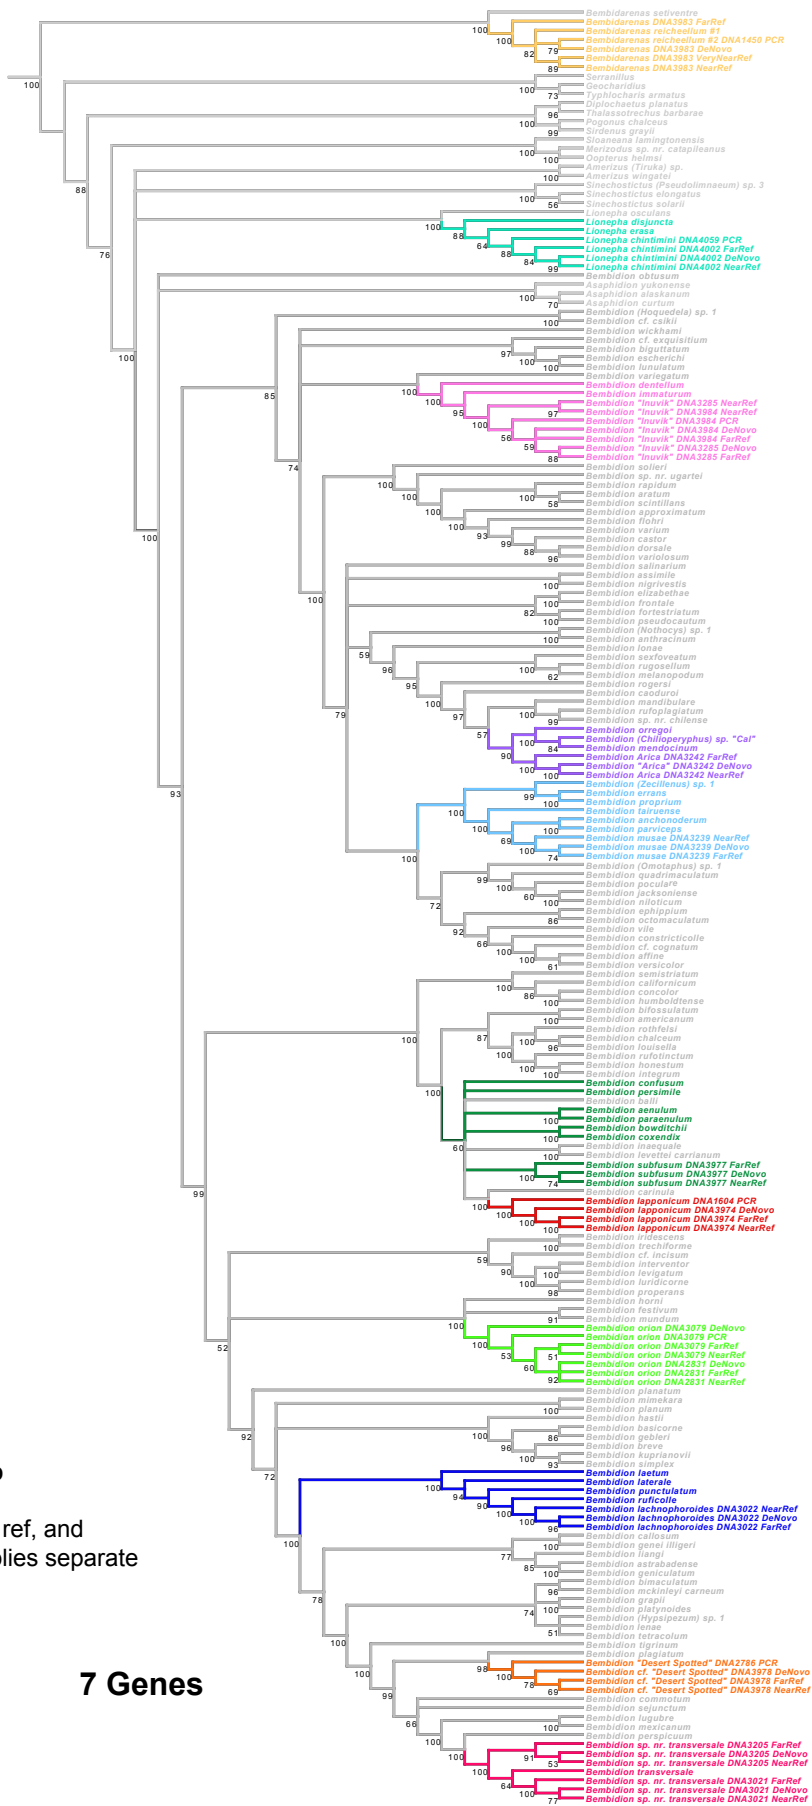

**ML Bootstrap**

de novo, near ref, and far ref assemblies separate

**7 Genes**

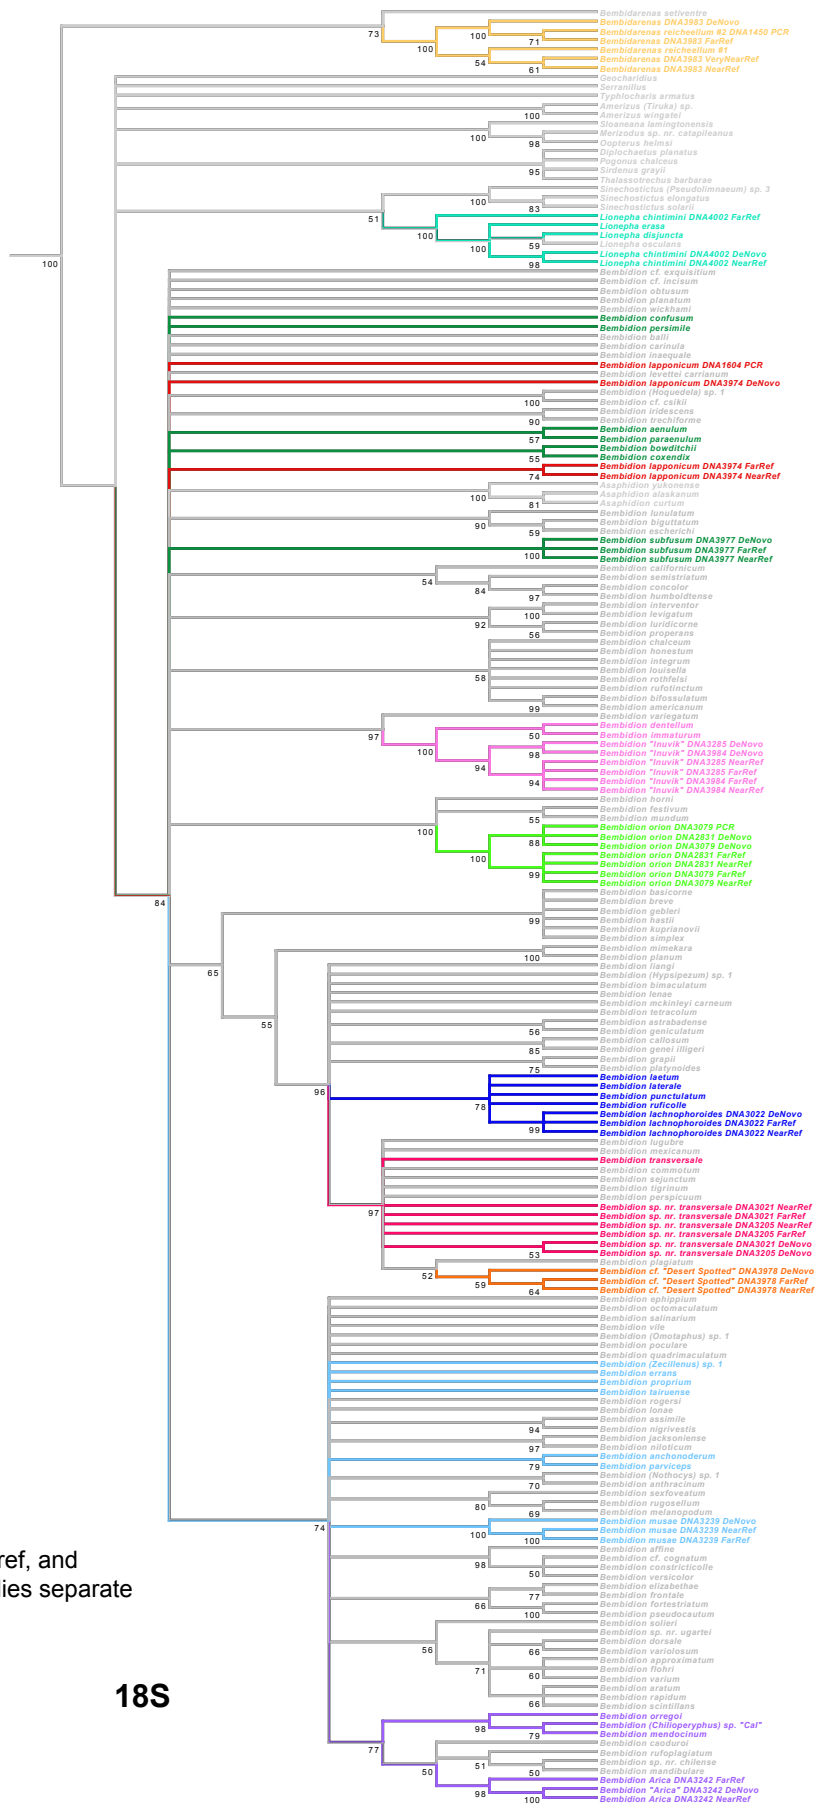

**ML Bootstrap**

de novo, near ref, and far ref assemblies separate

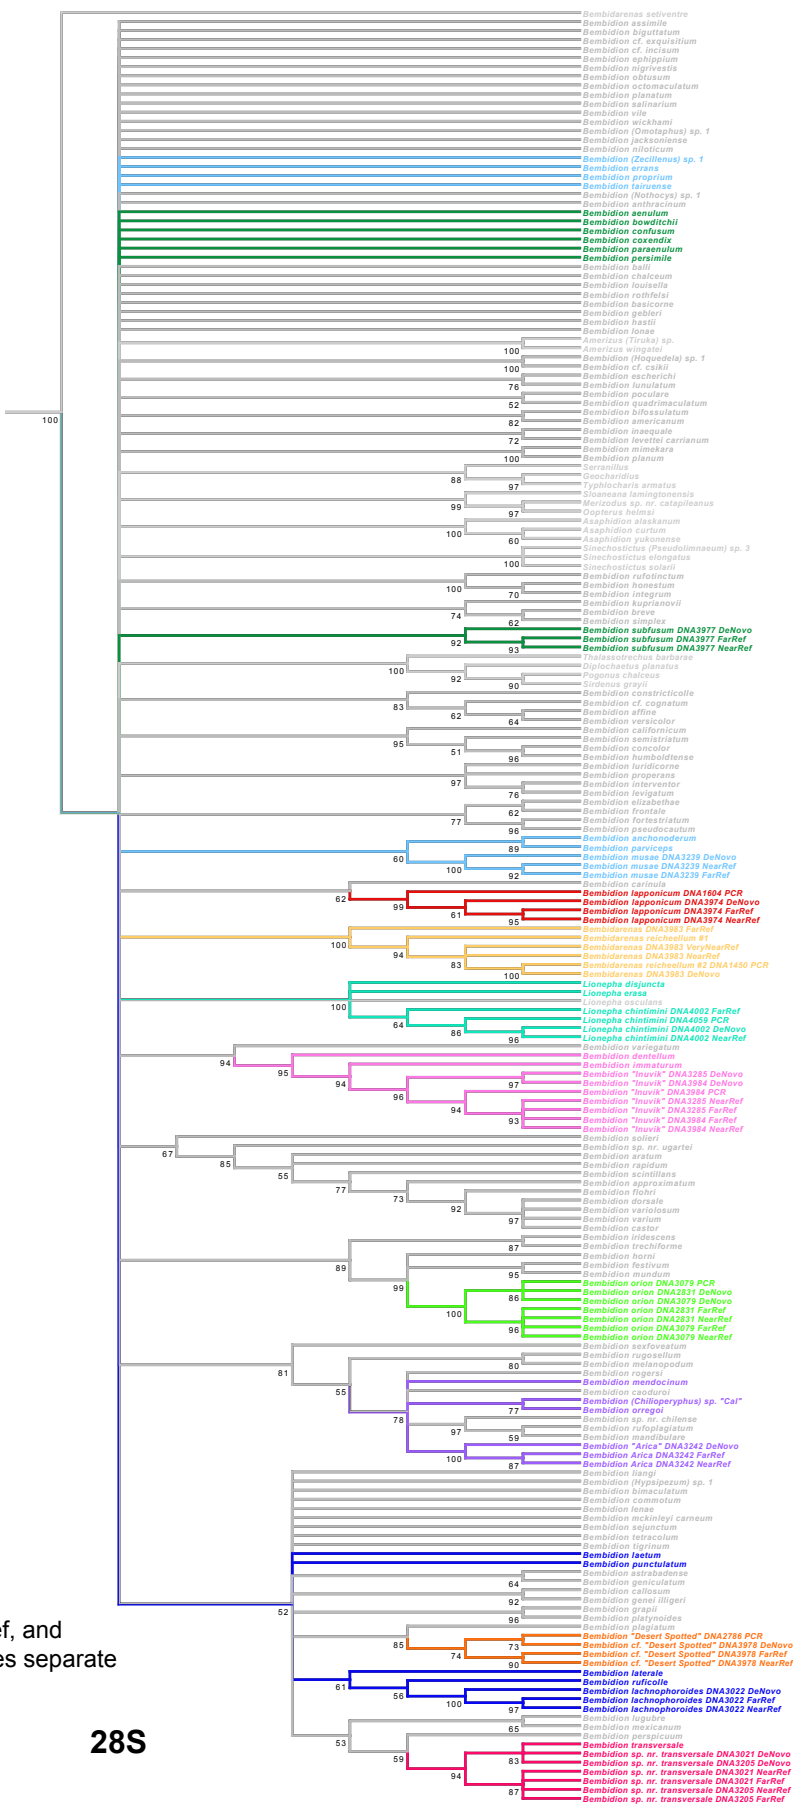

**ML Bootstrap**

de novo, near ref, and far ref assemblies separate

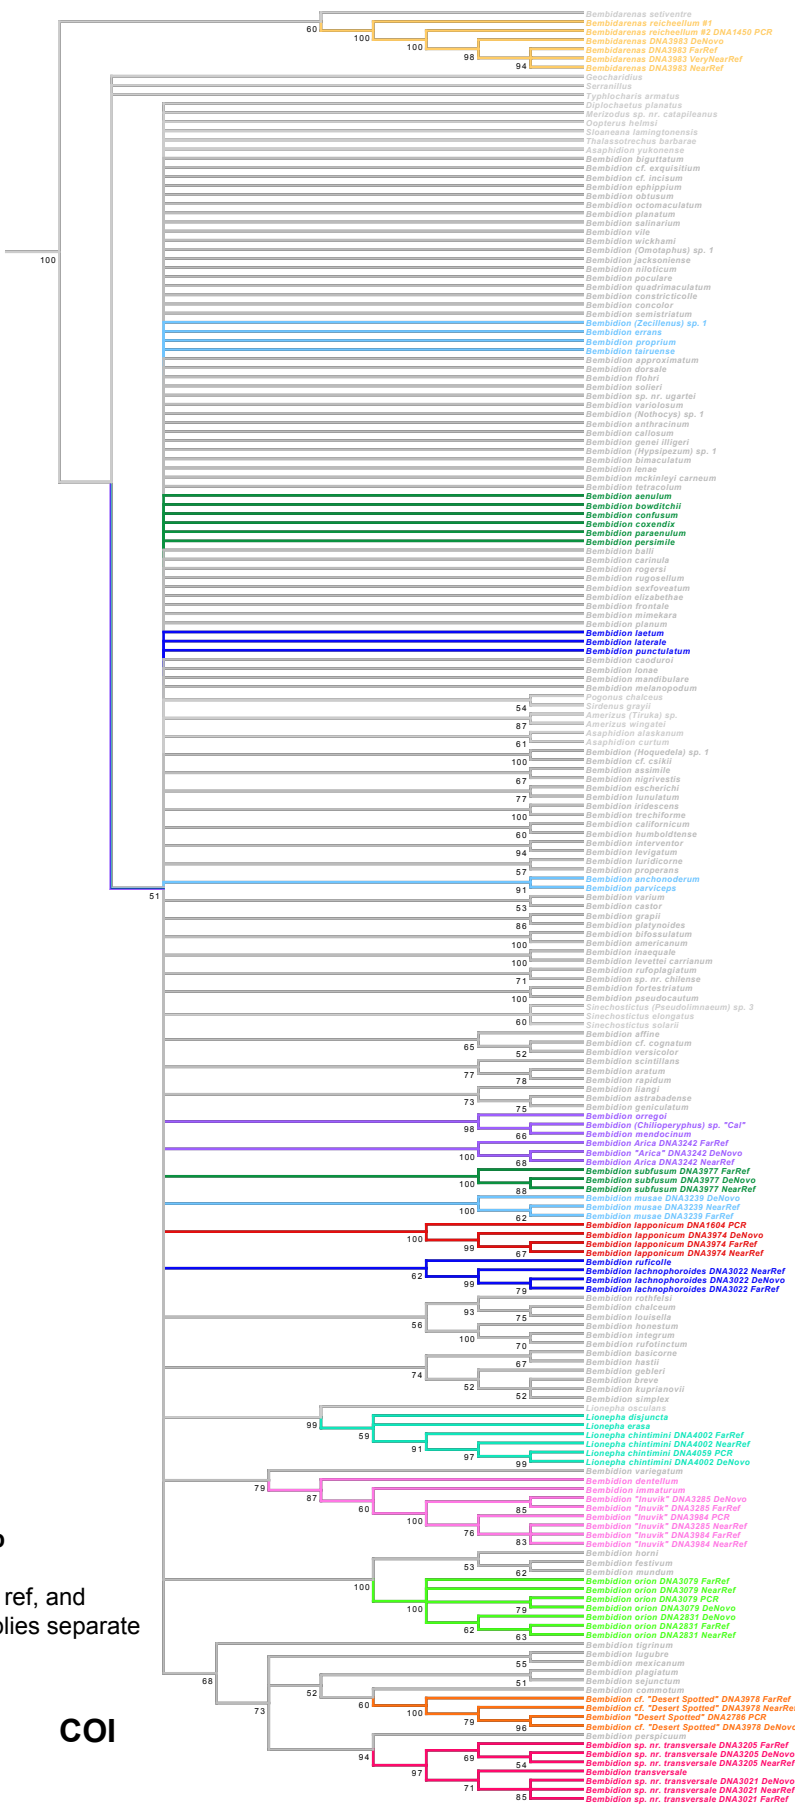

ML Bootstrap

*de novo*, near ref, and far ref assemblies separate

COI

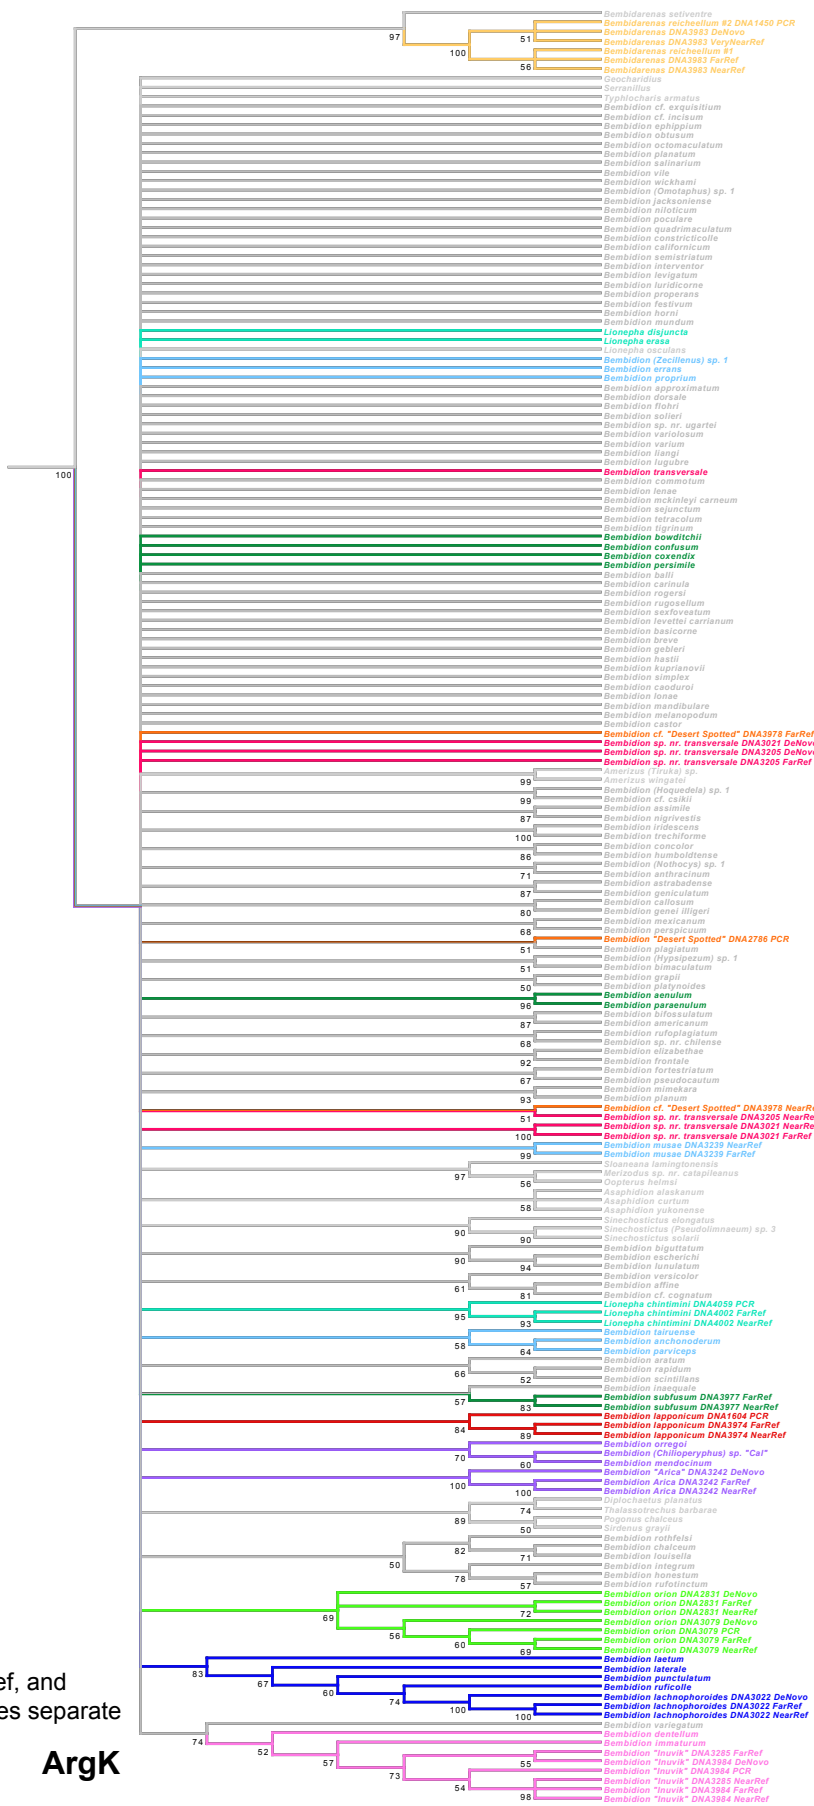

ML Bootstrap

de novo, near ref, and far ref assemblies separate

ArgK

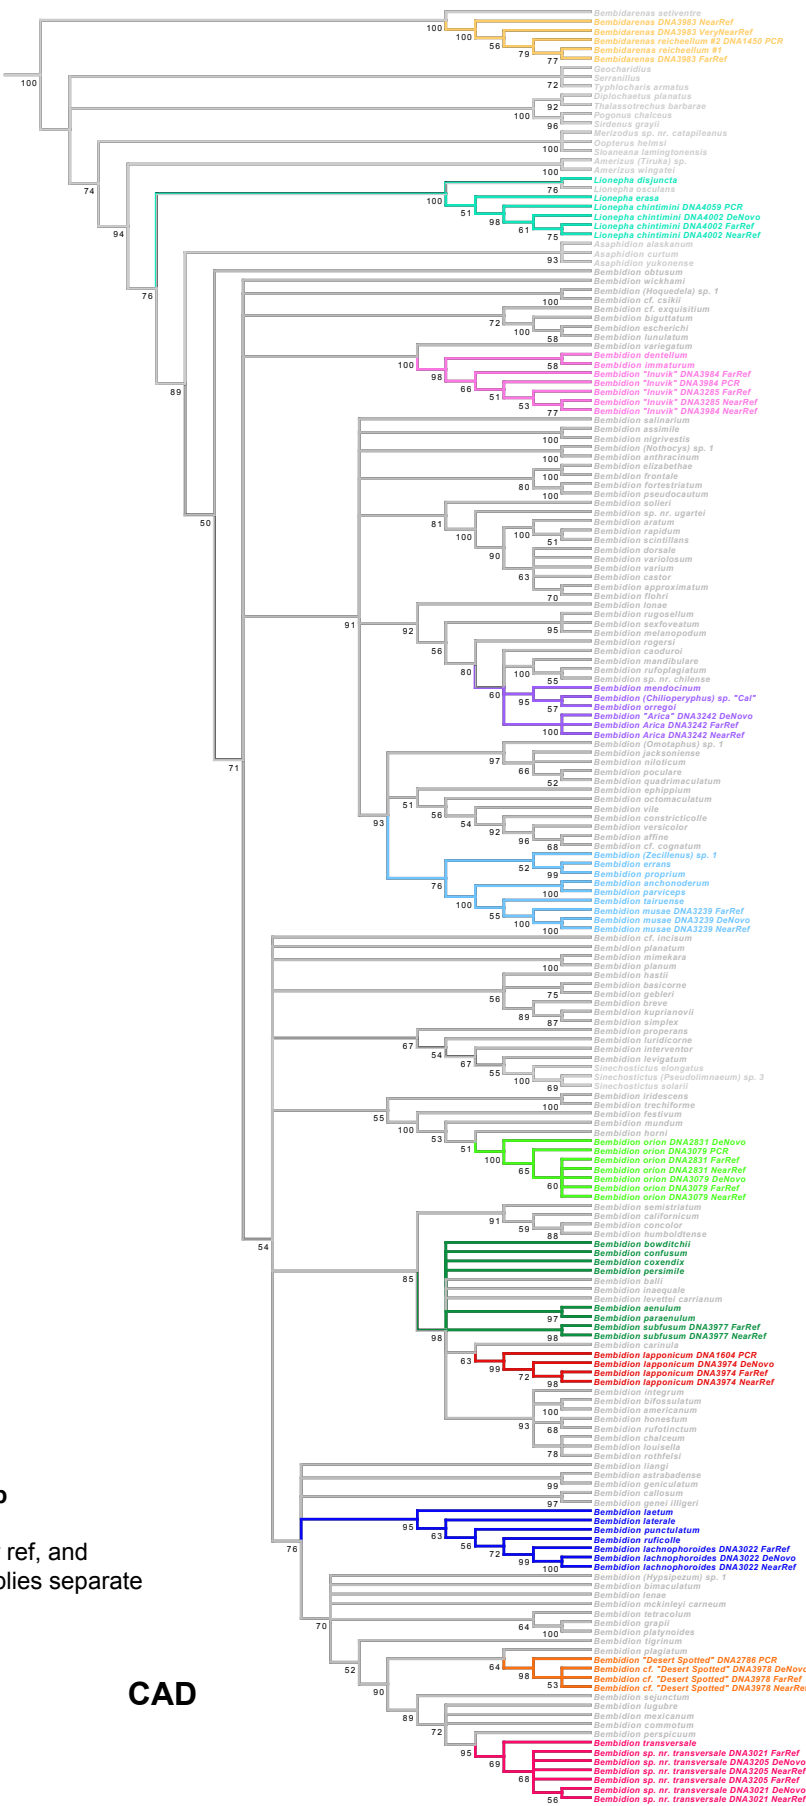

ML Bootstrap

de novo, near ref, and far ref assemblies separate

CAD

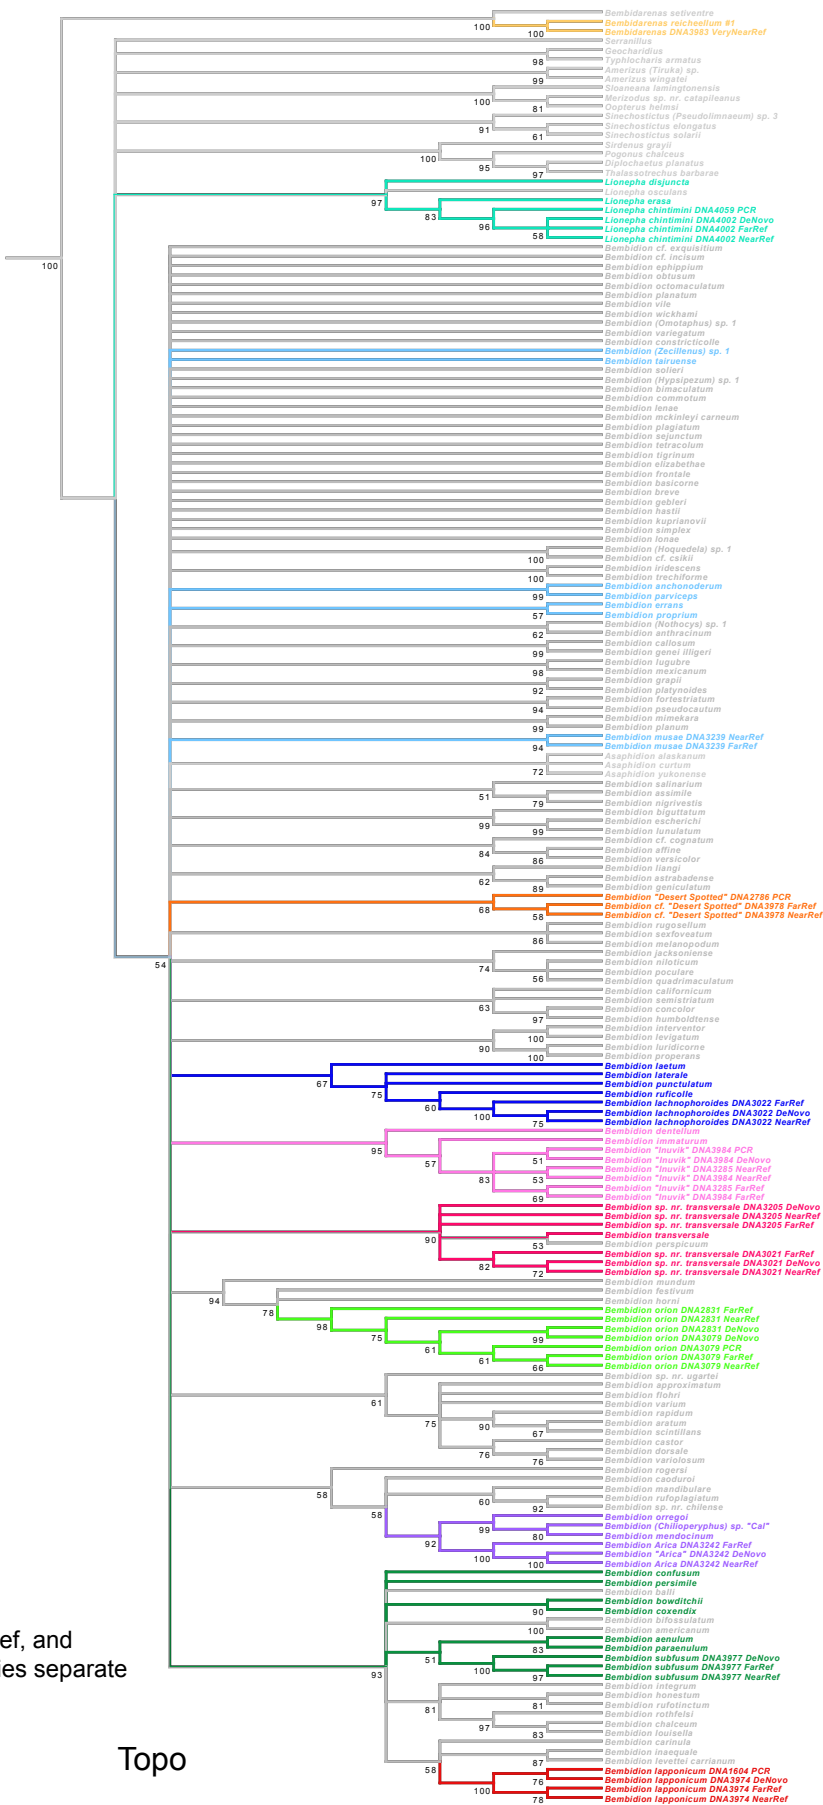

**ML Bootstrap**

de novo, near ref, and far ref assemblies separate

Topo

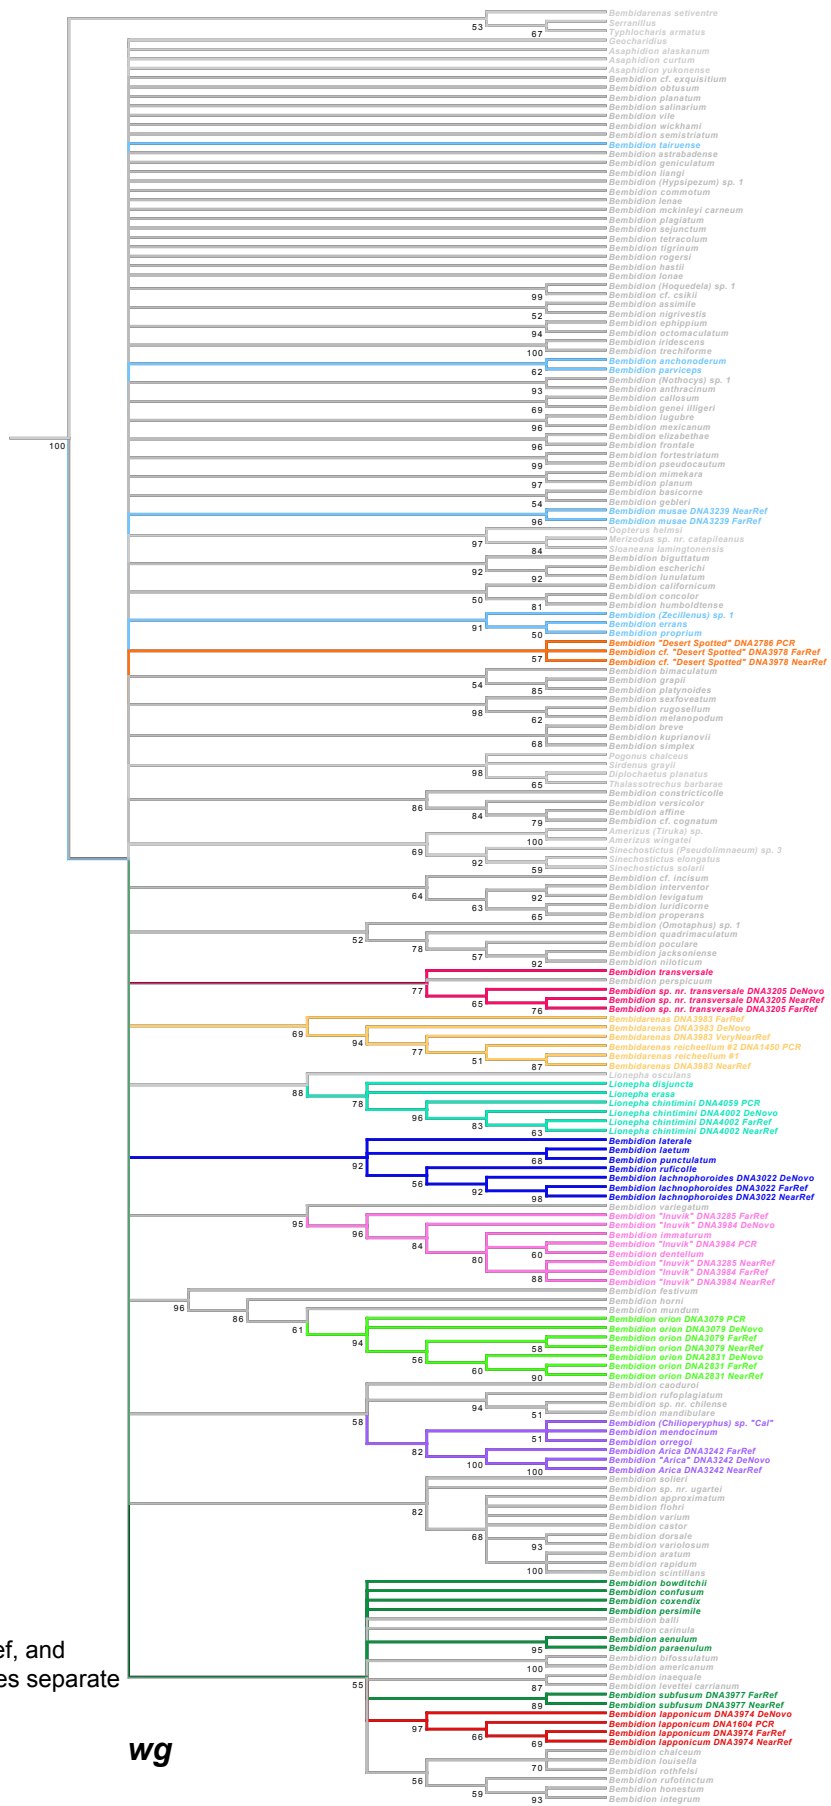

ML Bootstrap

de novo, near ref, and far ref assemblies separate

wg
