# Supplementary material for: Successful Recovery of Nuclear Protein-Coding Genes from Small Insects in Museums Using Illumina Sequencing
Source: PubMed Central journal article supplement (PMC4696846; doi:10.1371/journal.pone.0143929), 2015-12-30
Supplement: pone.0143929.s008.pdf [file pone.0143929.s008.pdf]

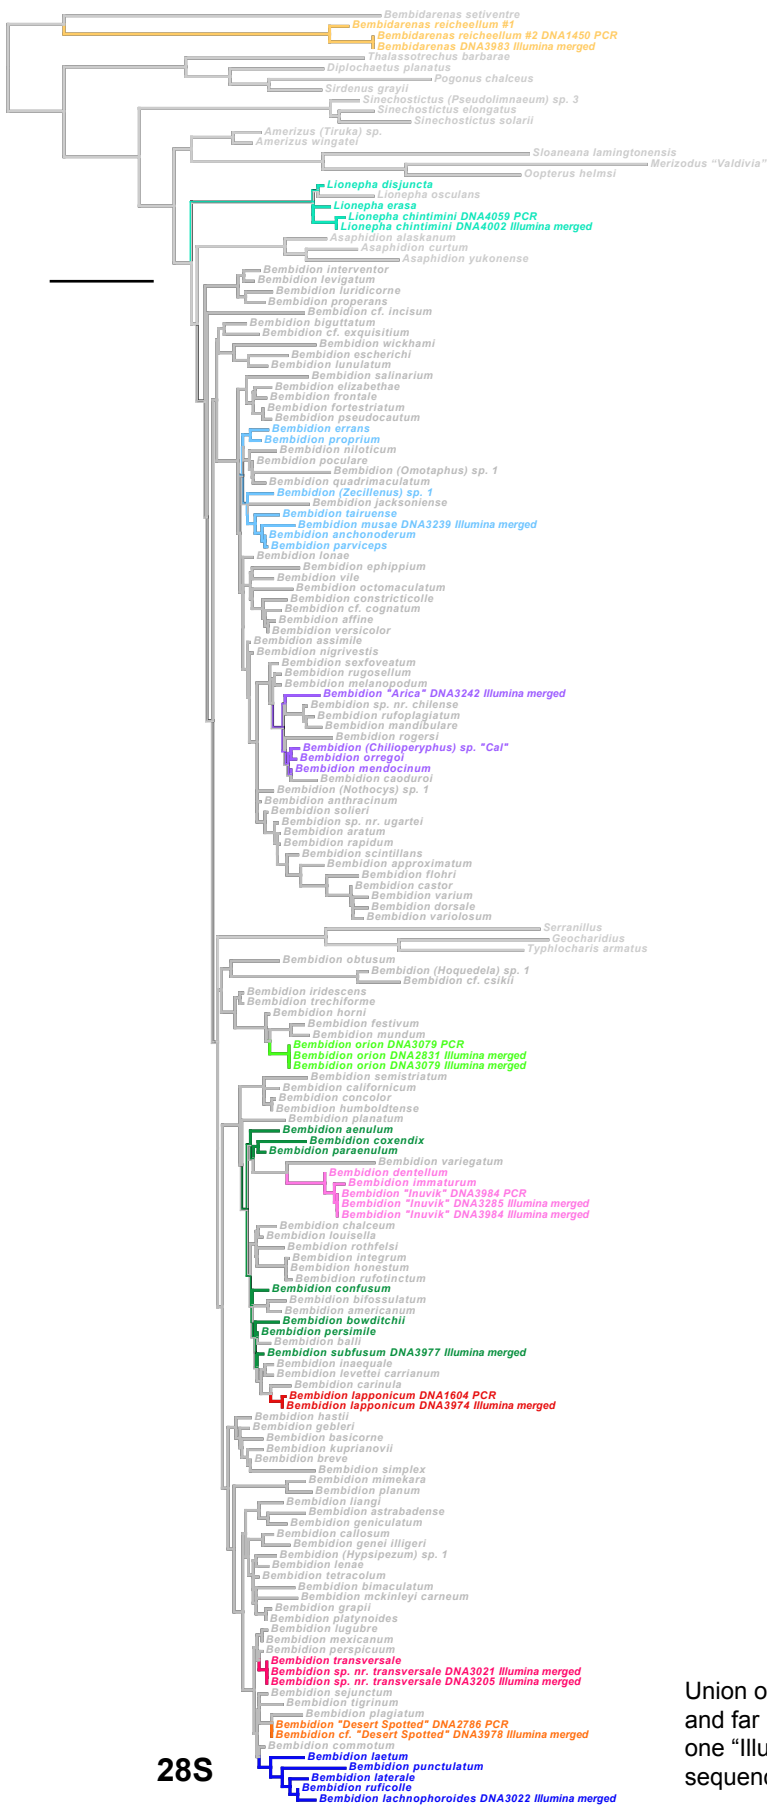

Union of *de novo*, near ref, and far ref assemblies form one "Illumina merged" sequence

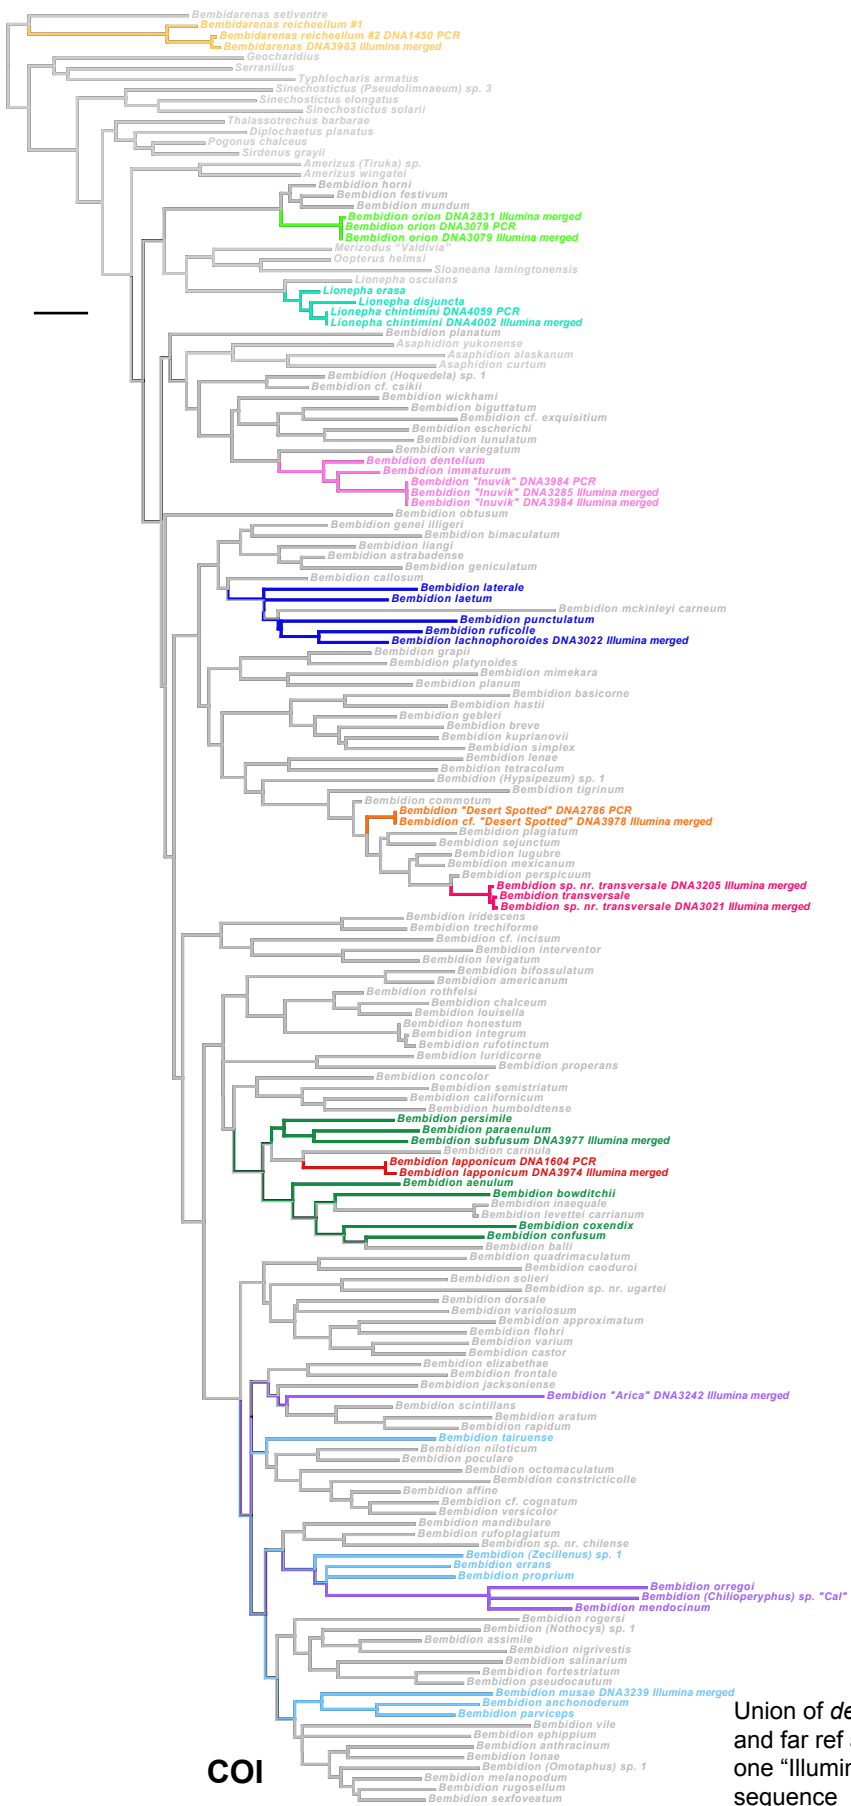

COI

Union of de novo, near ref, and far ref assemblies form one "Illumina merged" sequence

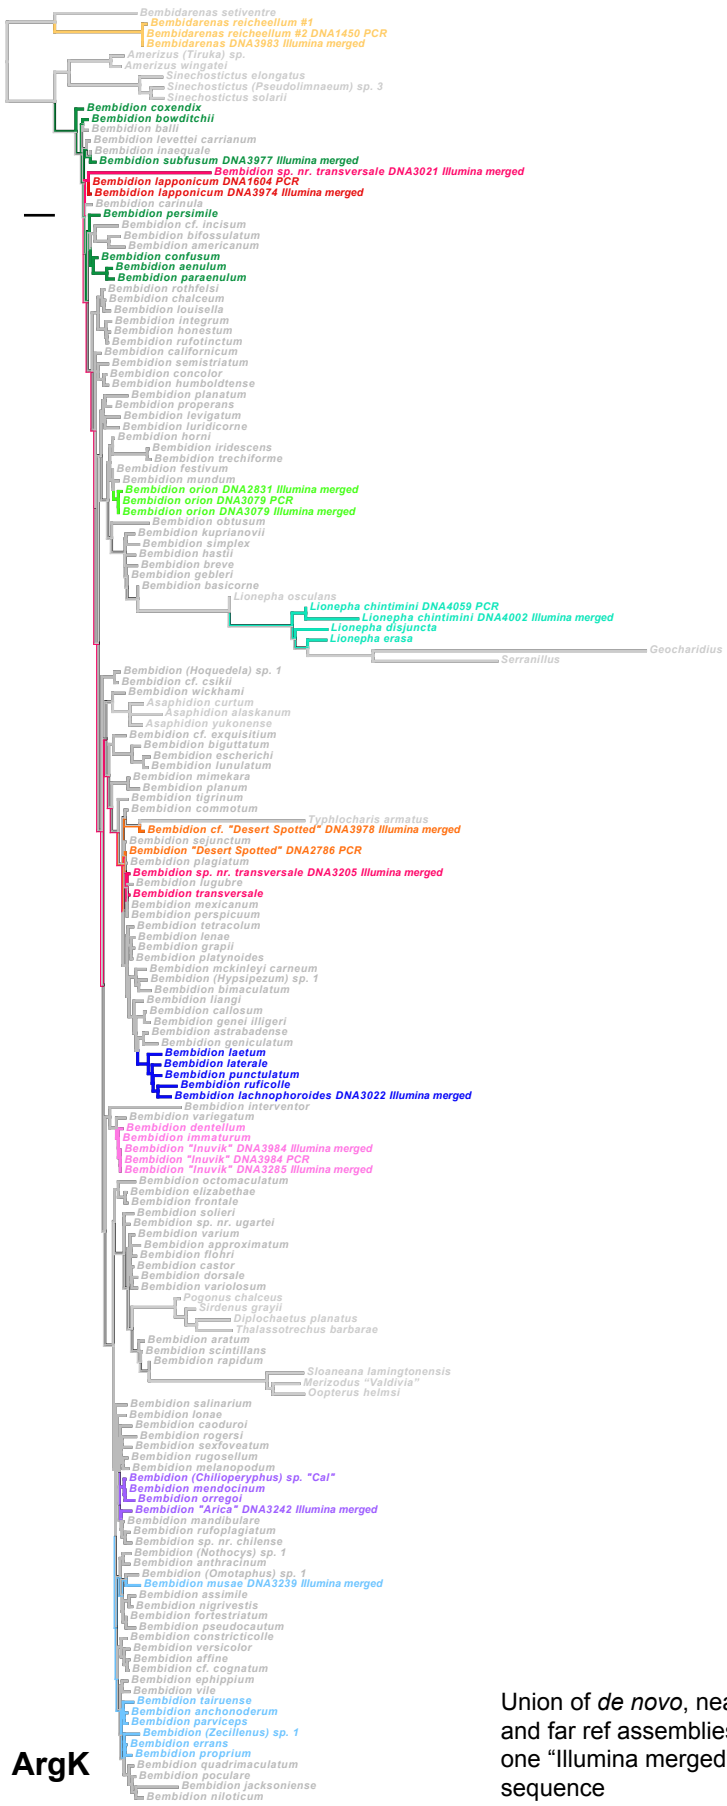

ArgK

Union of *de novo*, near ref, and far ref assemblies form one "Illumina merged" sequence

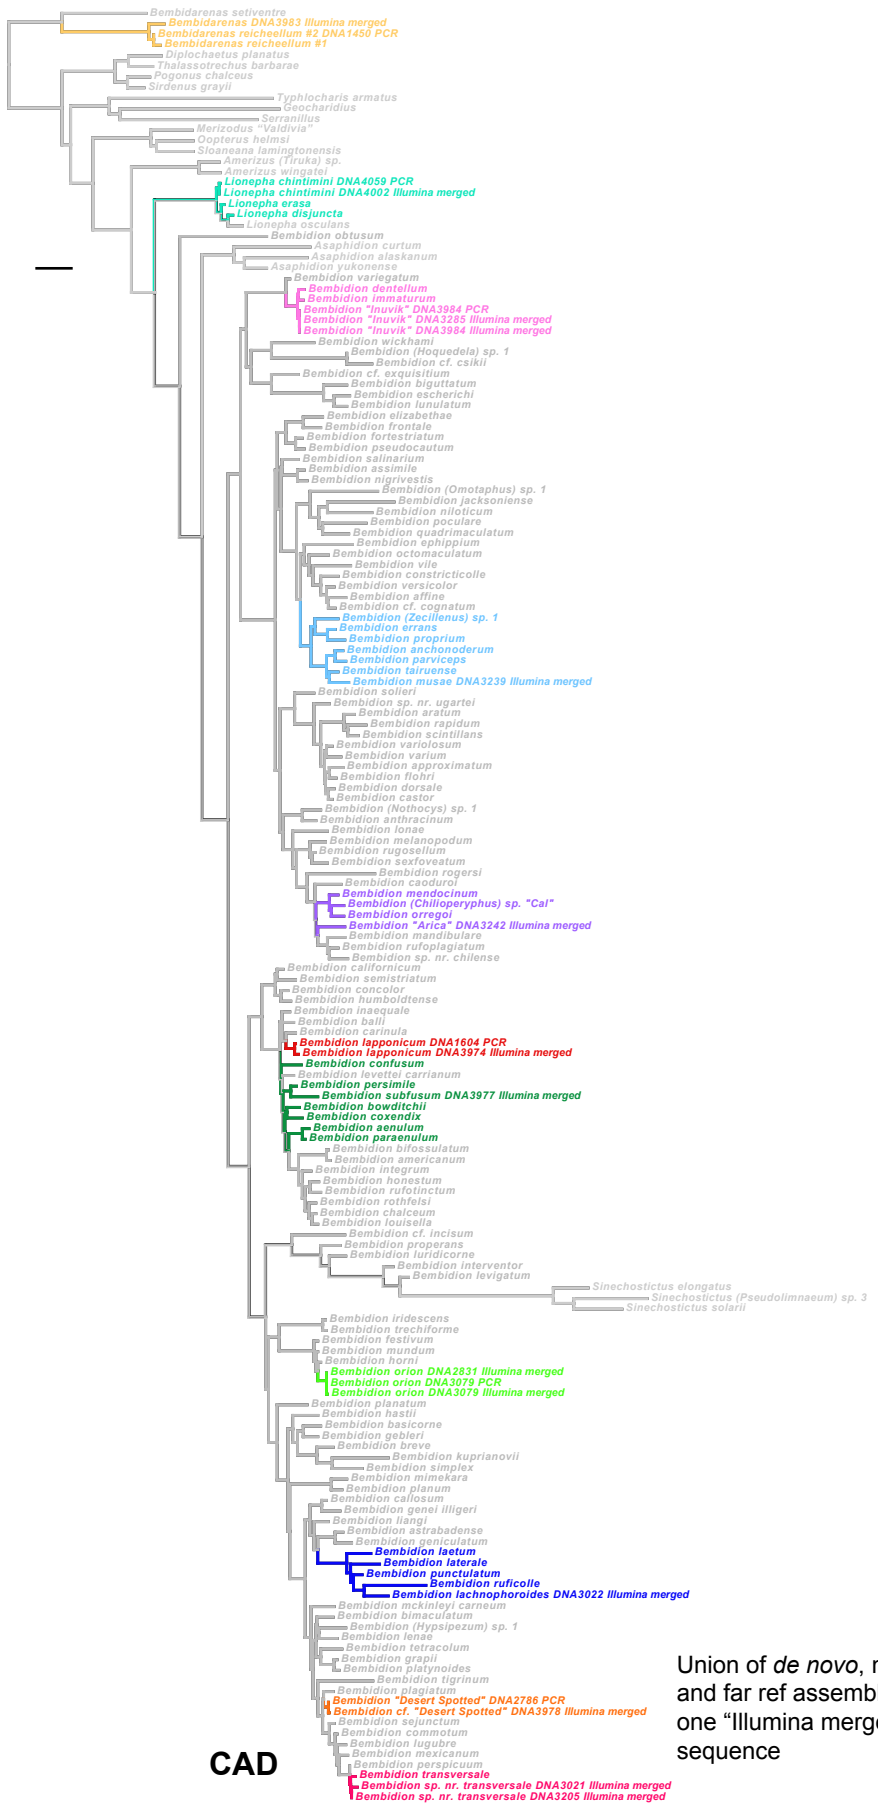

CAD

Union of *de novo*, near ref, and far ref assemblies form one "Illumina merged" sequence

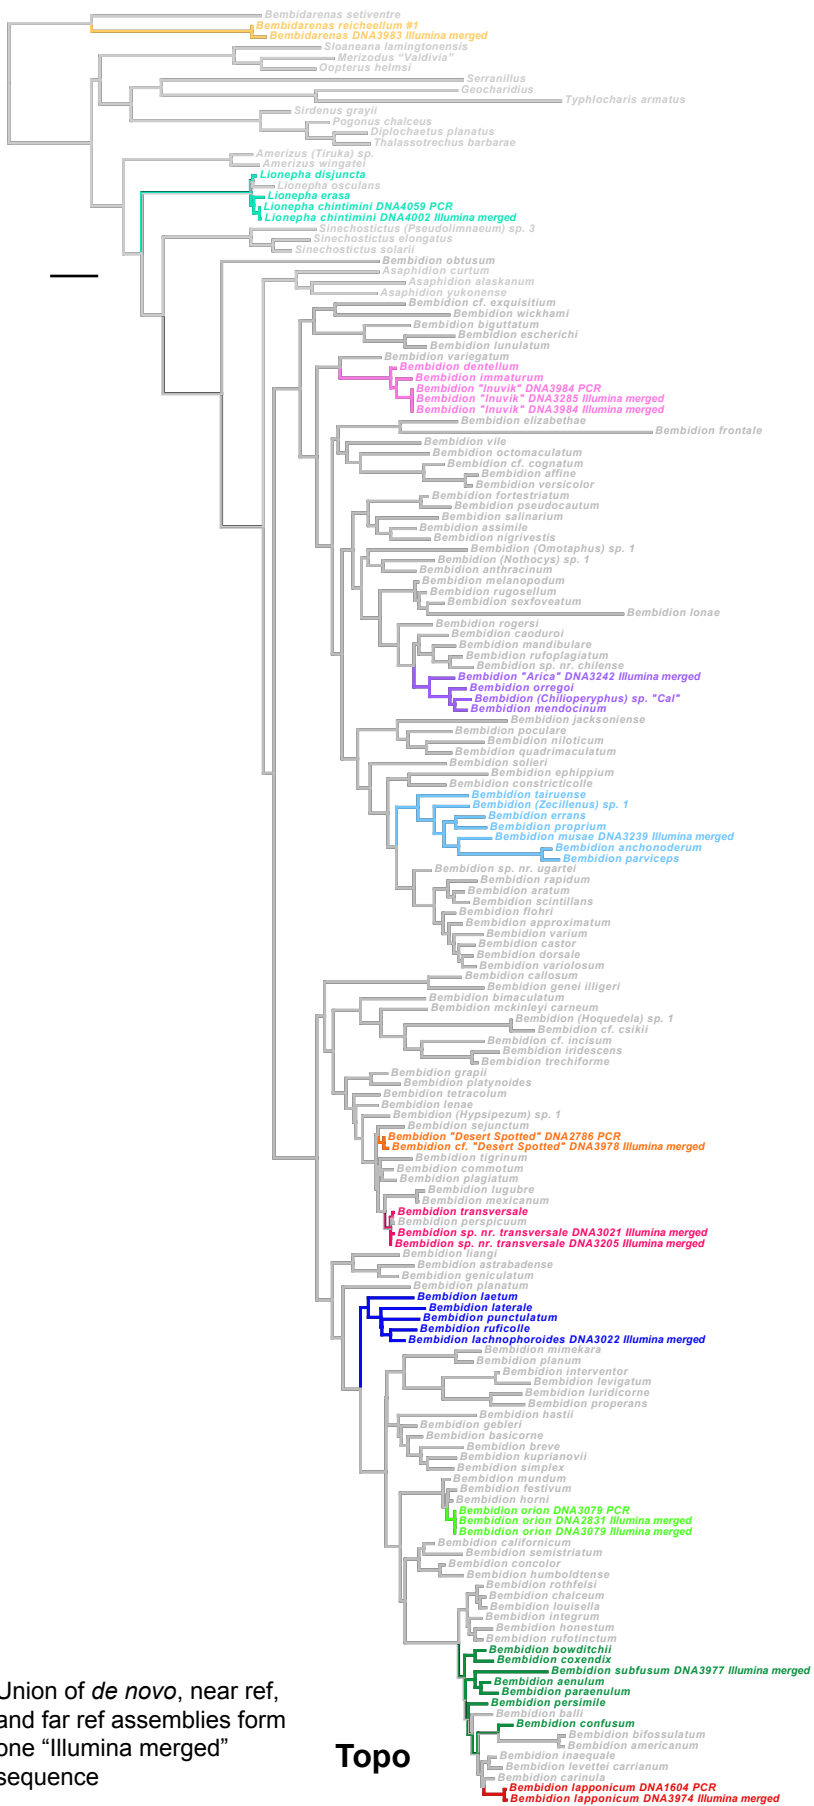

Union of *de novo*, near ref,  
and far ref assemblies form  
one "illumina merged"  
sequence

Topo

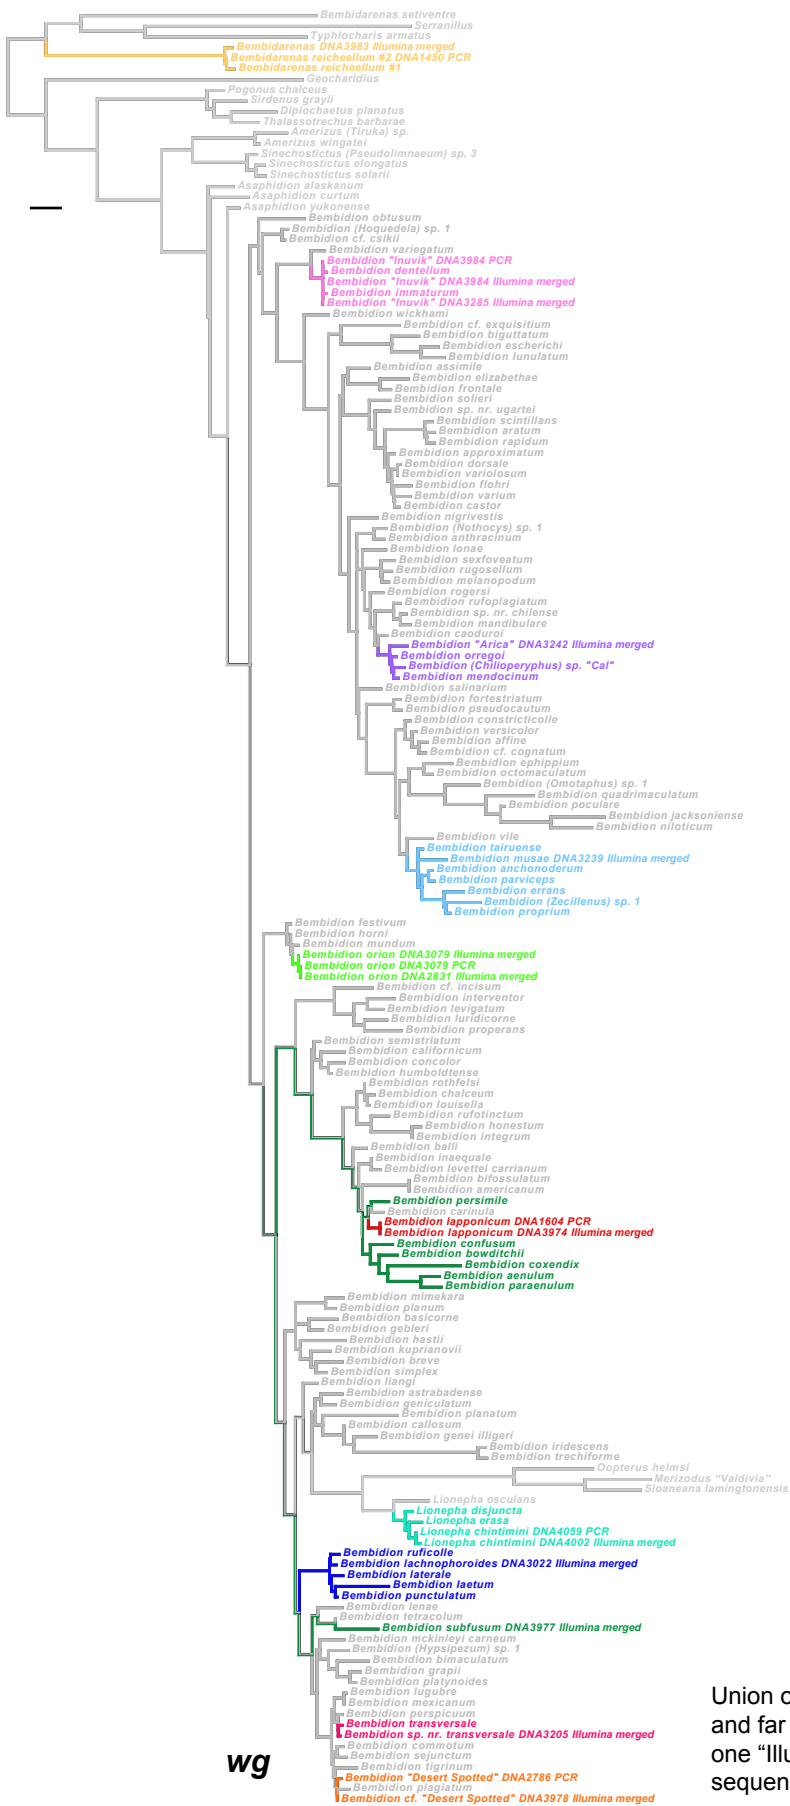

Union of *de novo*, near ref, and far ref assemblies form one "Illumina merged" sequence
