# Supplementary material for: Successful Recovery of Nuclear Protein-Coding Genes from Small Insects in Museums Using Illumina Sequencing
Source: PubMed Central journal article supplement (PMC4696846; doi:10.1371/journal.pone.0143929), 2015-12-30
Supplement: pone.0143929.s009.pdf [file pone.0143929.s009.pdf]

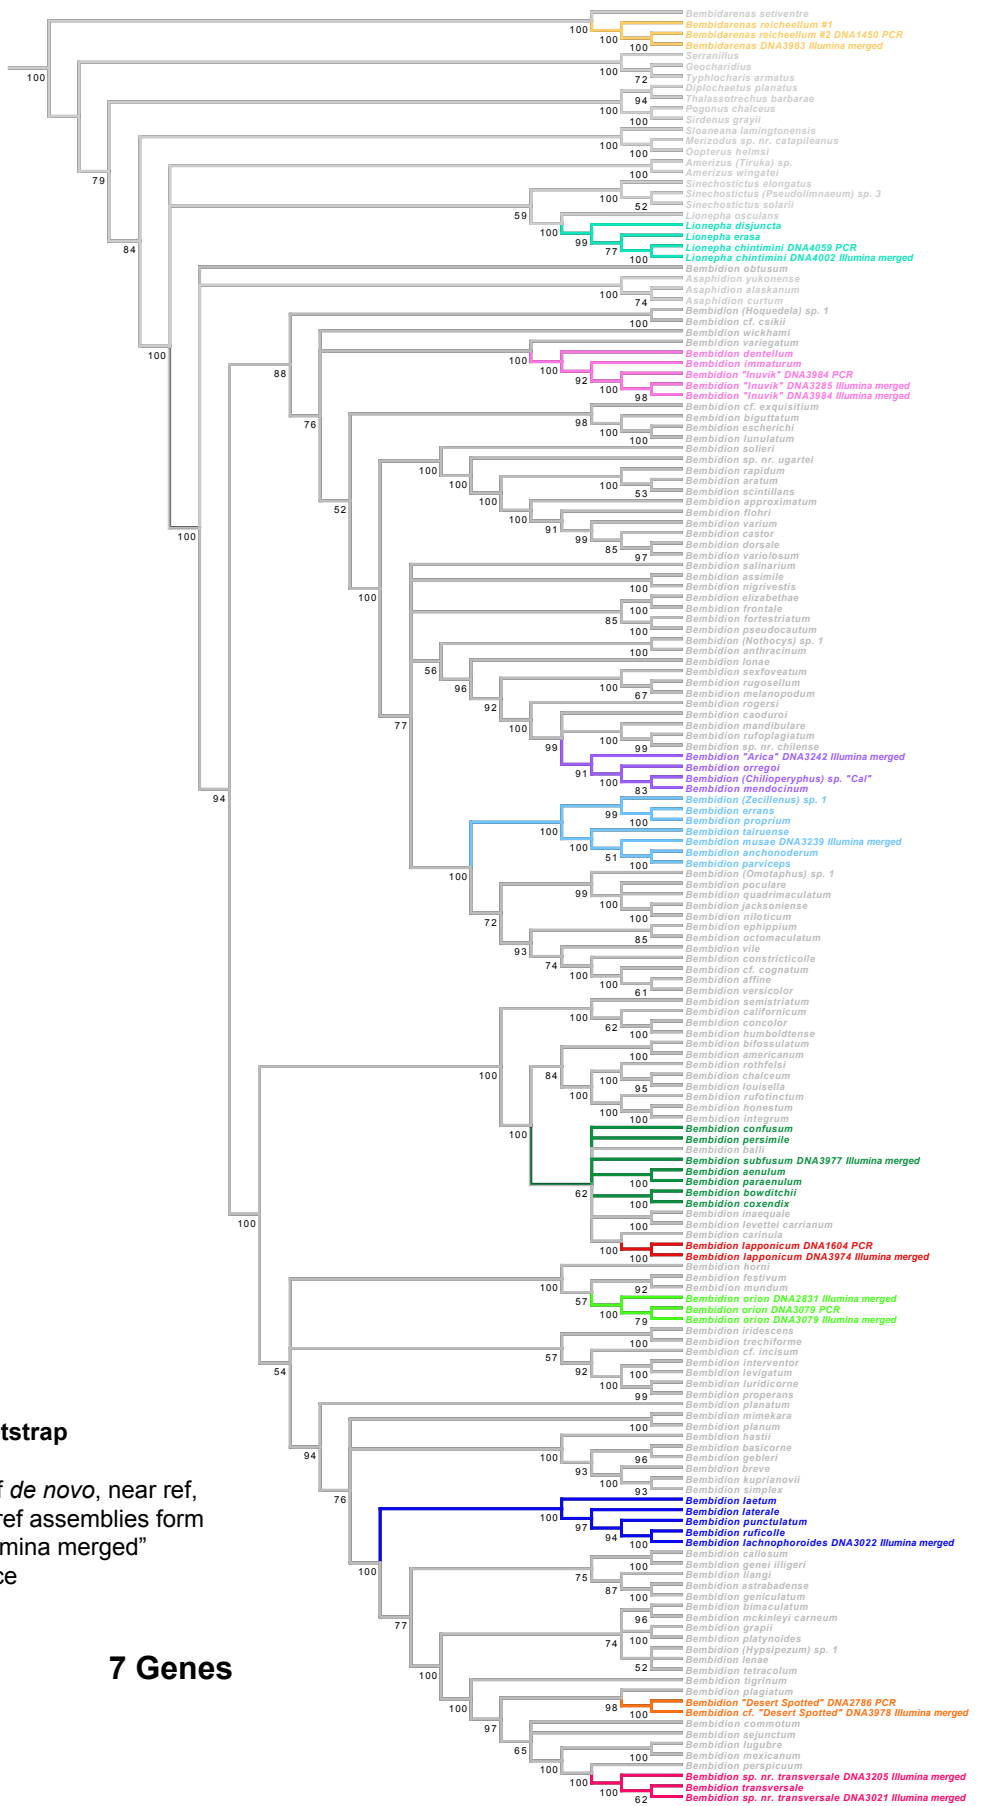

## ML Bootstrap

Union of *de novo*, near ref, and far ref assemblies form one "Illumina merged" sequence

## 7 Genes

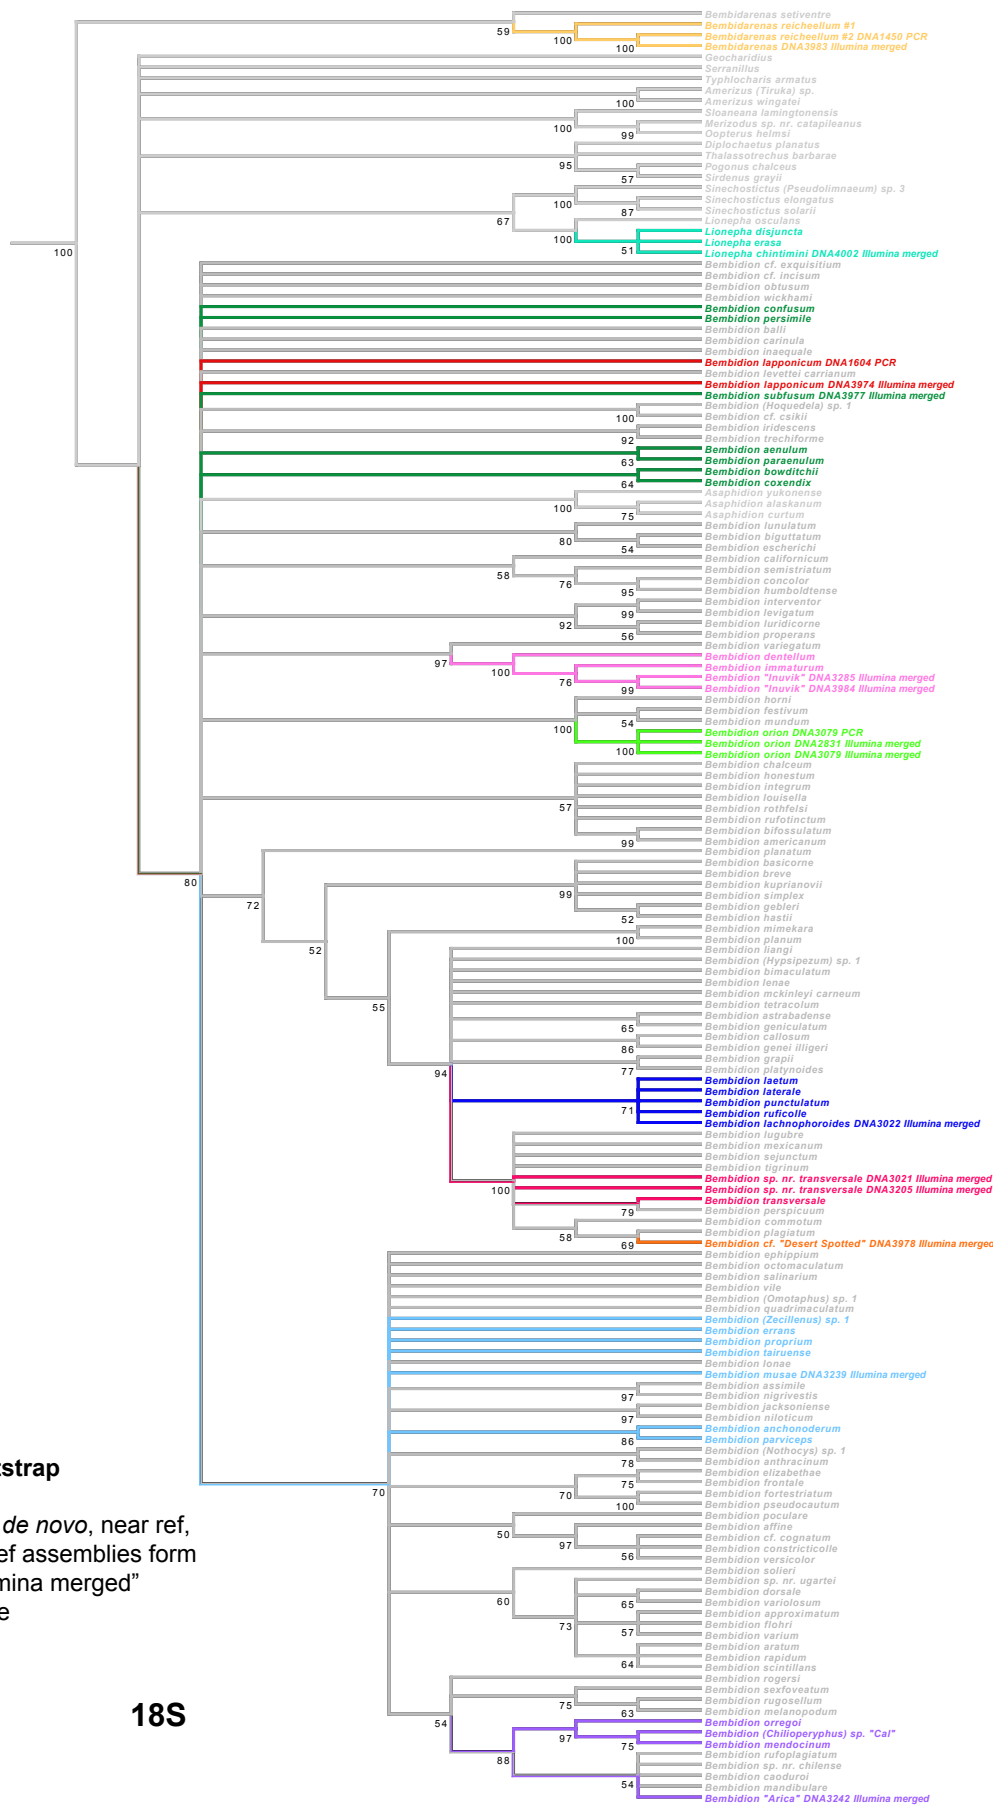

**ML Bootstrap**

Union of *de novo*, near ref, and far ref assemblies form one "Illumina merged" sequence

**18S**

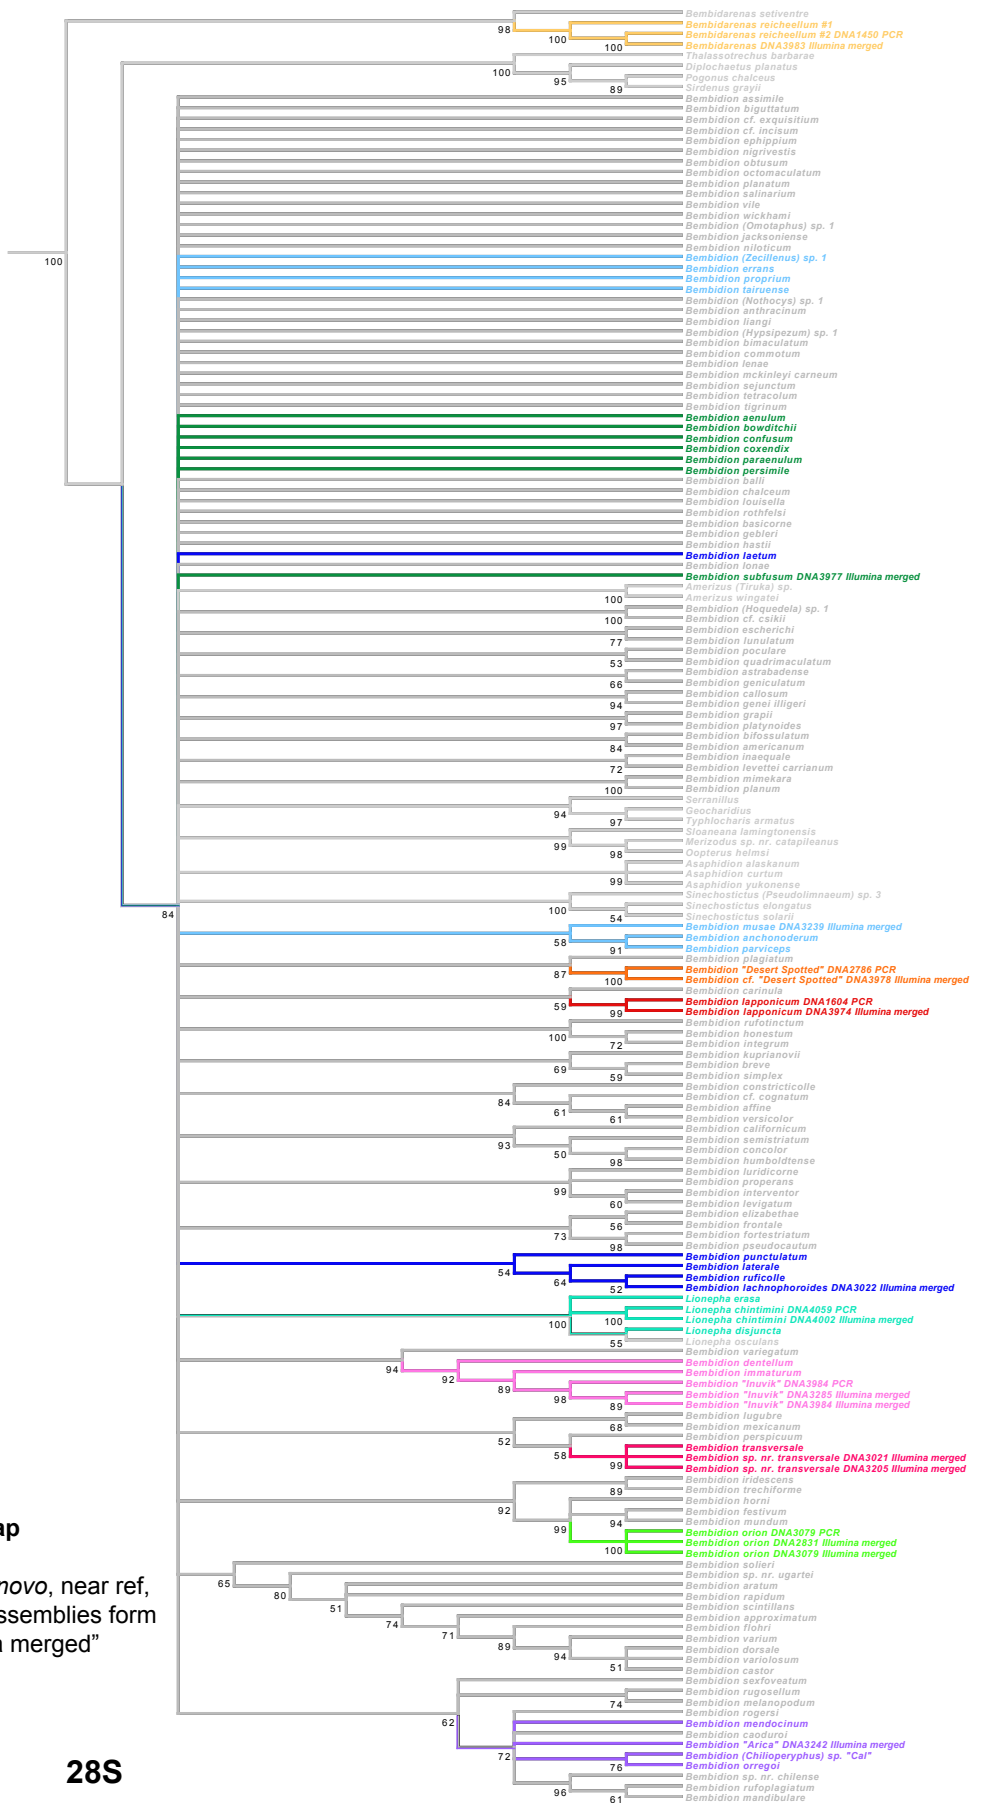

**ML Bootstrap**

Union of *de novo*, near ref, and far ref assemblies form one "Illumina merged" sequence

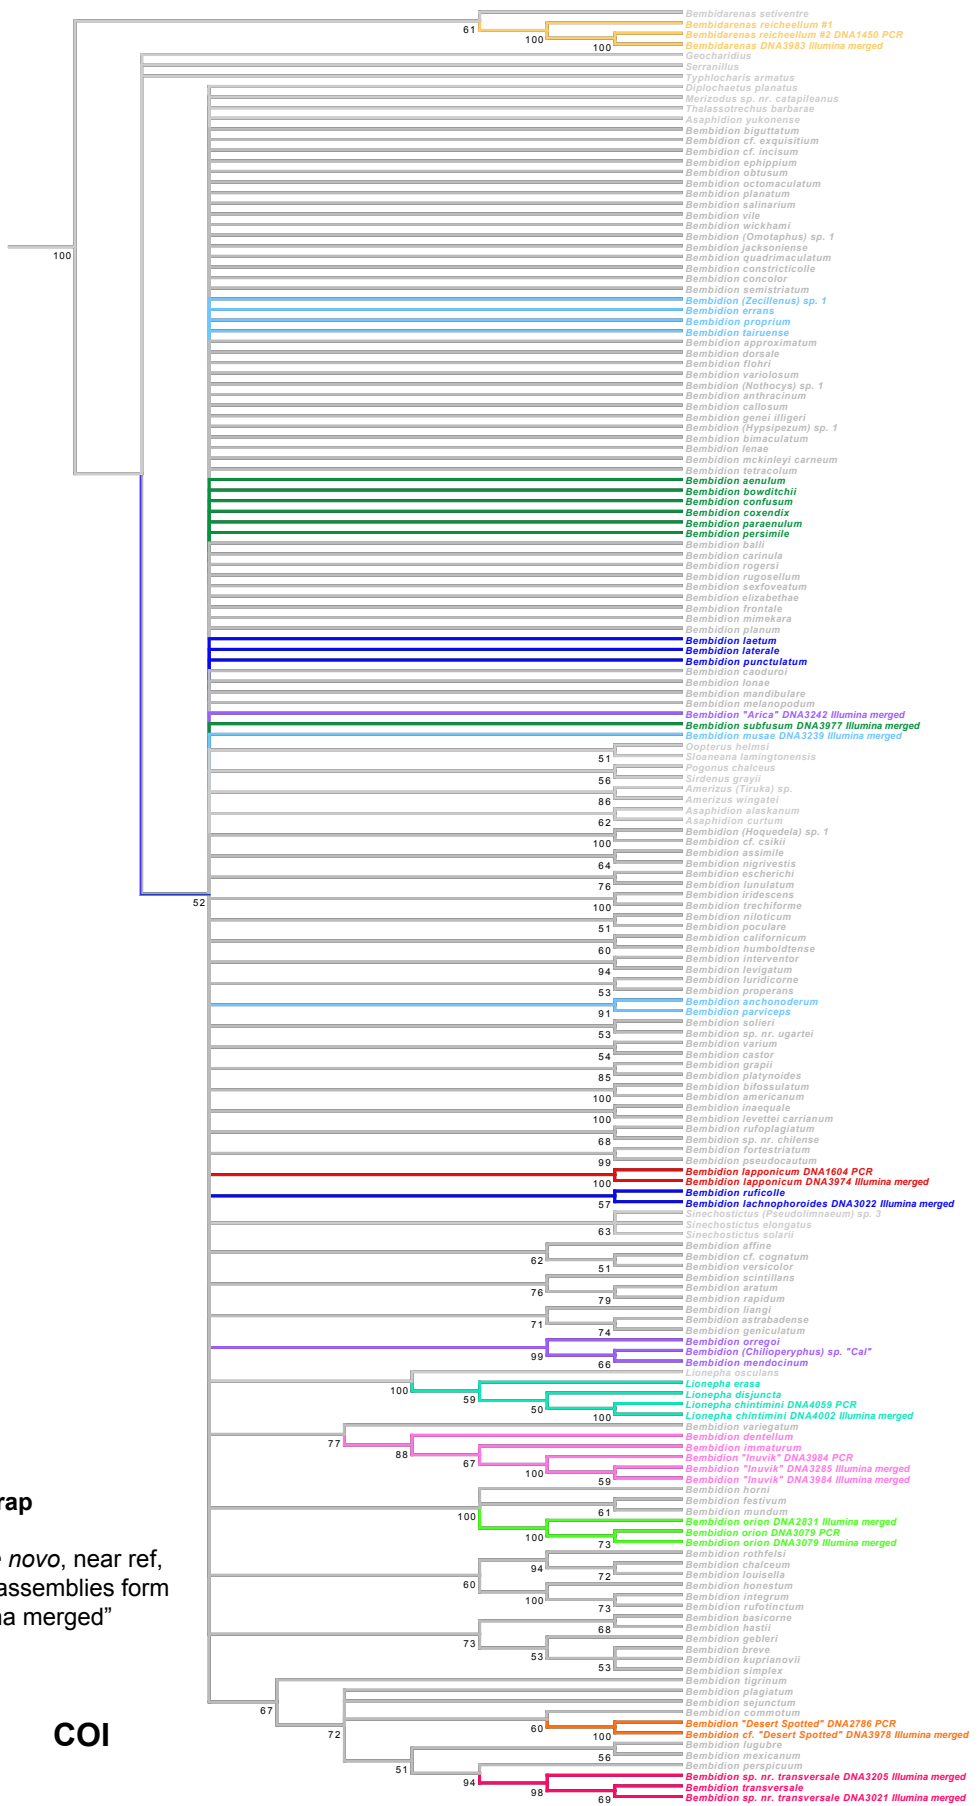

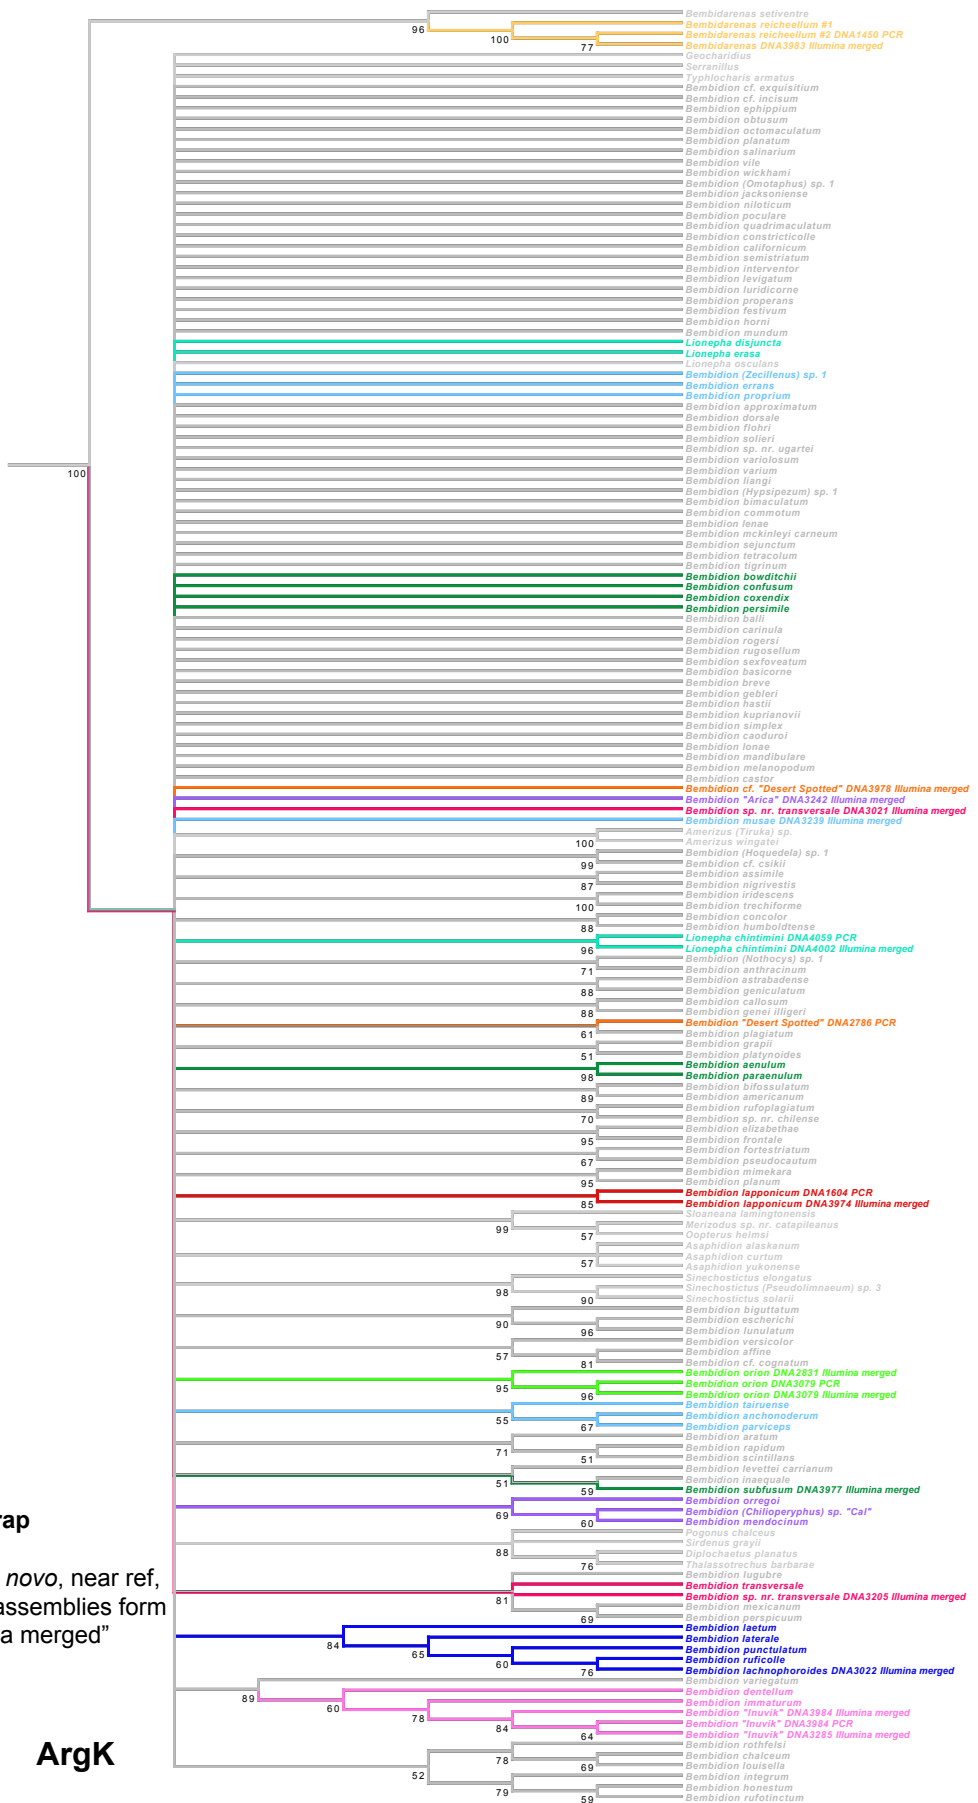

**ML Bootstrap**

Union of *de novo*, near ref, and far ref assemblies form one "Illumina merged" sequence

**ArgK**

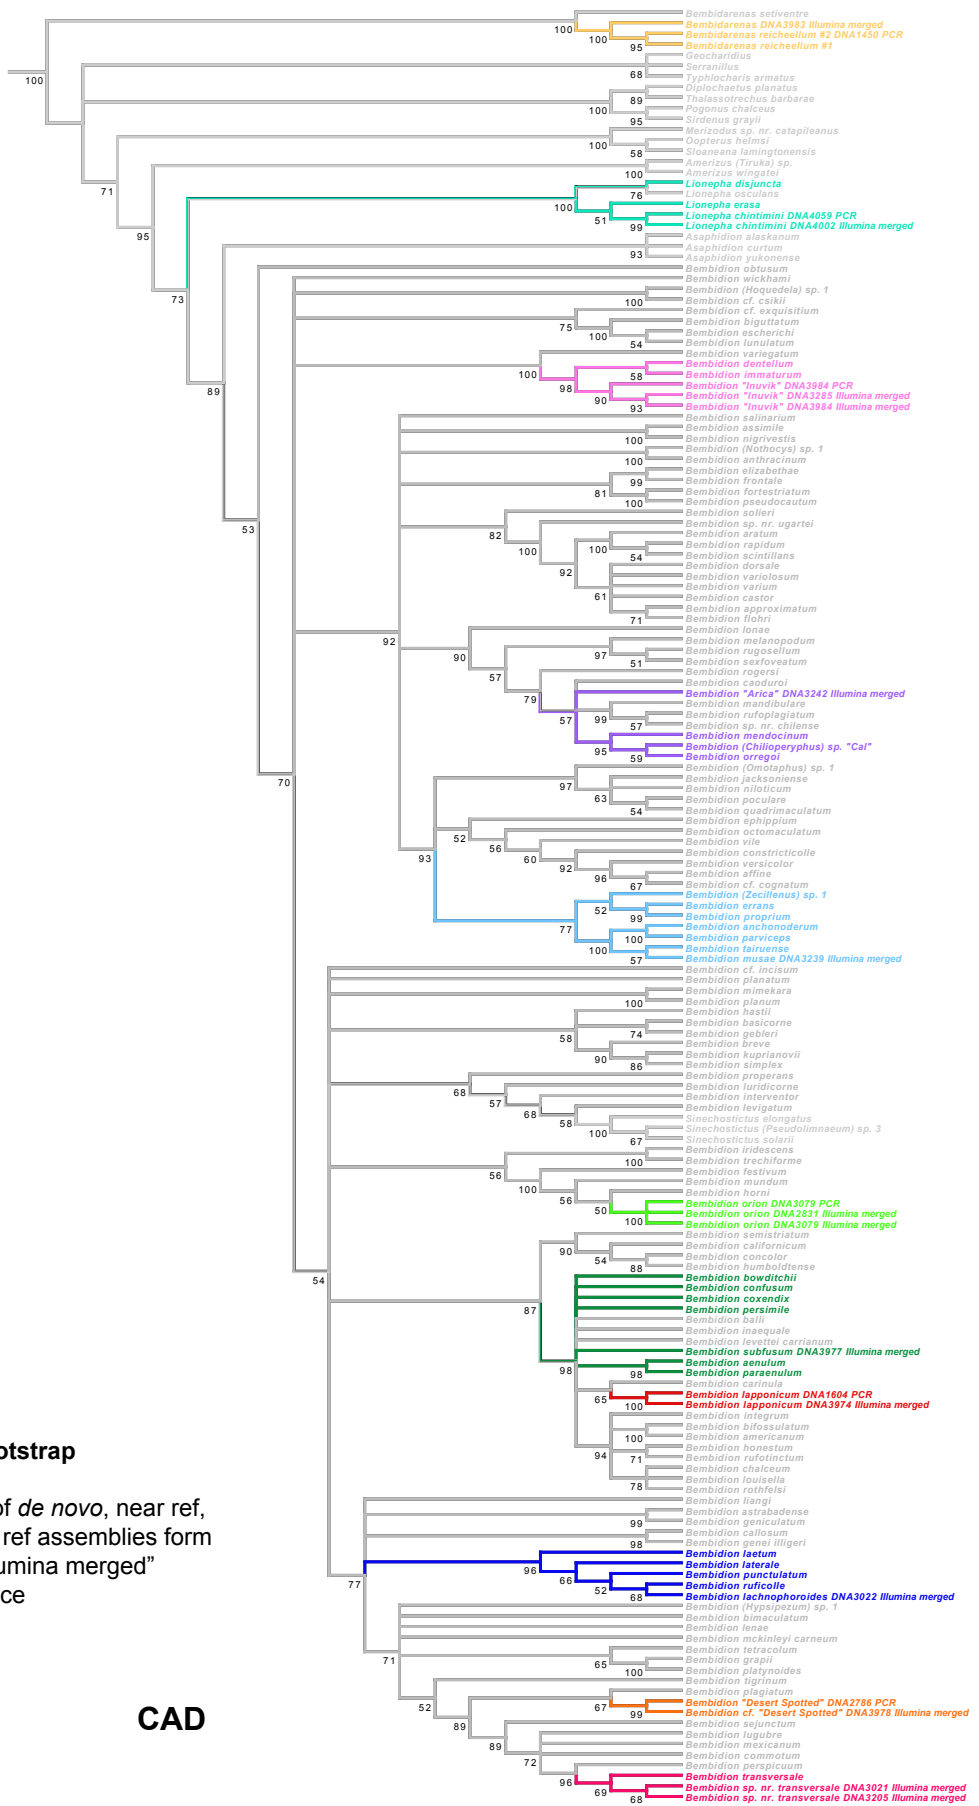

**ML Bootstrap**

Union of *de novo*, near ref, and far ref assemblies form one "Illumina merged" sequence

**CAD**

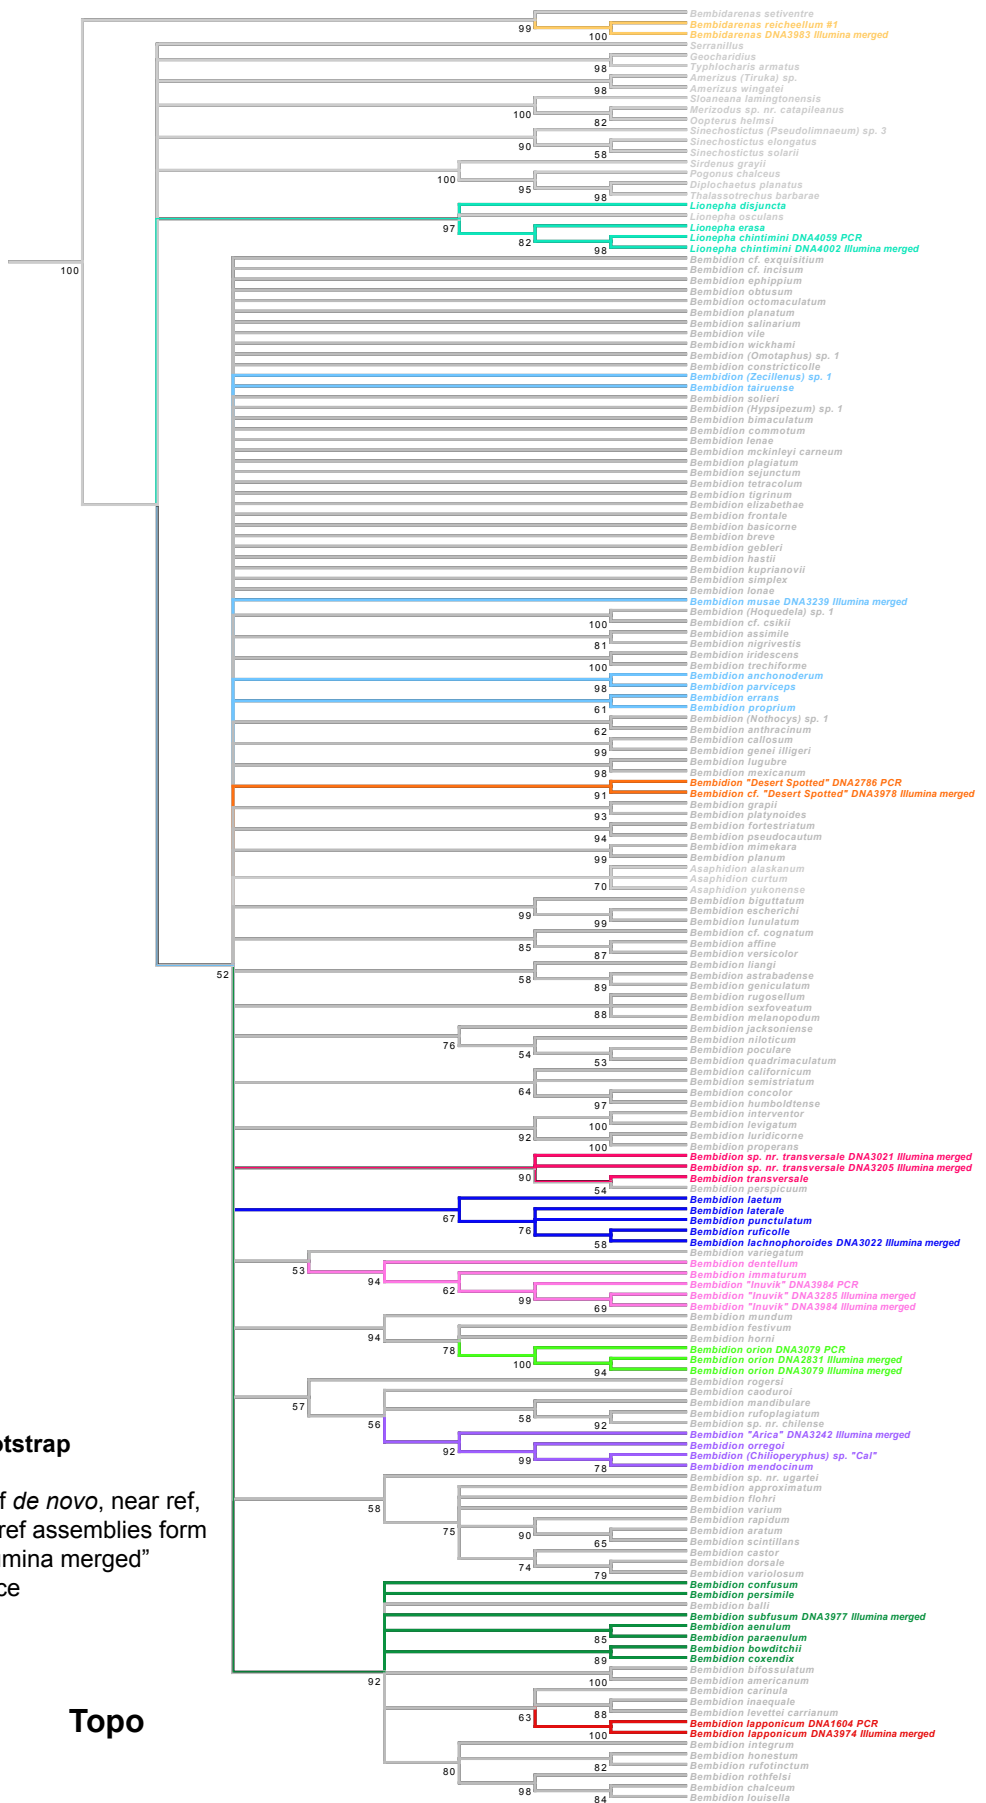

## ML Bootstrap

Union of *de novo*, near ref, and far ref assemblies form one "Illumina merged" sequence

Topo

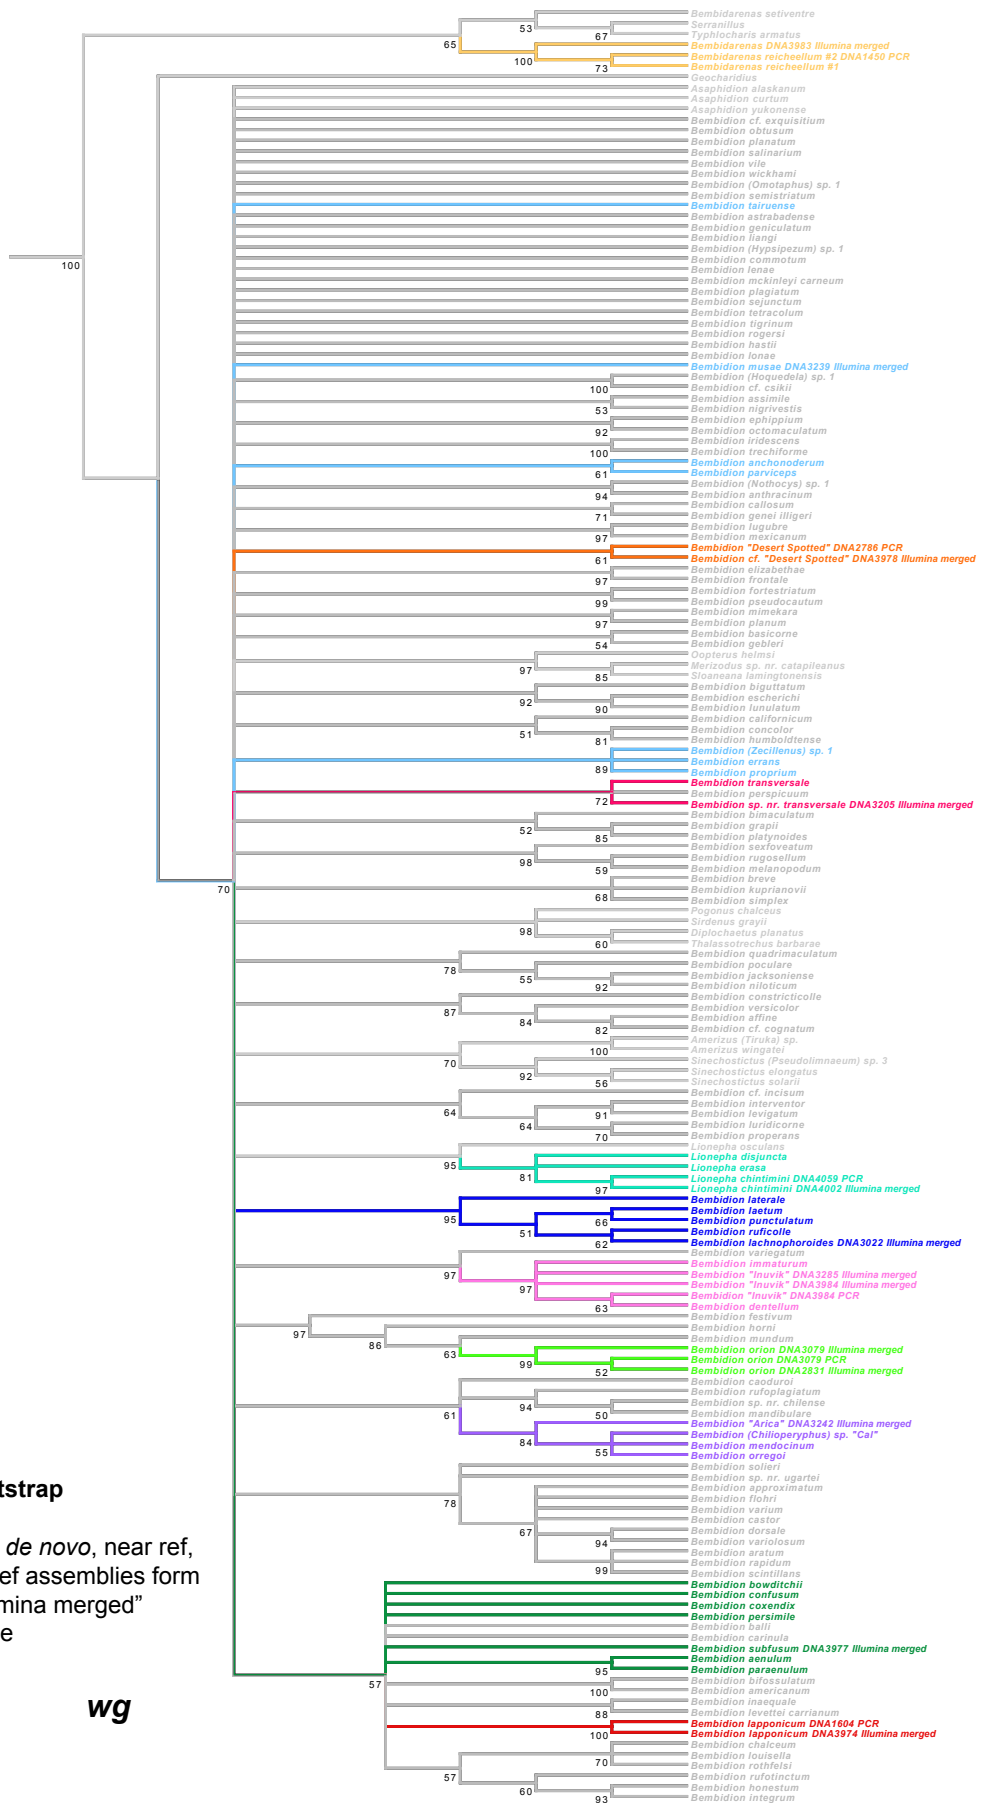

**ML Bootstrap**

Union of *de novo*, near ref, and far ref assemblies form one "Illumina merged" sequence

**wg**
