# Supplementary material for: Successful Recovery of Nuclear Protein-Coding Genes from Small Insects in Museums Using Illumina Sequencing
Source: PubMed Central journal article supplement (PMC4696846; doi:10.1371/journal.pone.0143929), 2015-12-30
Supplement: pone.0143929.s010.pdf [file pone.0143929.s010.pdf]

|                       | subf        | snt1         | Lchi         | lach         | bdrs         | ori1         | inu1         | lapp         | aric         | dspt         | mus          | inu2         | ori2         | snt2         | Average     |
|-----------------------|-------------|--------------|--------------|--------------|--------------|--------------|--------------|--------------|--------------|--------------|--------------|--------------|--------------|--------------|-------------|
| 8018fin1_2            | 0.00        | 0.00         | 0.77         | 0.00         | 0.32         | -0.38        | 0.00         | 0.49         | -0.71        | 0.57         | 0.00         | 0.29         | -0.14        | 0.29         | 0.11        |
| 3044fin1_2            | 0.00        | 0.00         | -0.48        | -0.26        | 0.16         | 0.00         | 0.00         | -0.08        | -0.08        | 0.36         | -0.45        | 0.16         | 0.00         | -0.24        | -0.06       |
| 8028fin1_2            | 0.00        | 0.00         | -0.52        | 0.20         | 0.00         | 0.27         | 0.00         | 0.70         | -0.02        | 0.56         | 0.29         | -0.25        | -0.04        | 0.42         | 0.10        |
| 197fin1_2             | 0.00        | 0.58         | 0.00         | -0.55        | 0.00         | -0.58        | 0.00         | 0.00         | -0.51        | 0.24         | 0.00         | -0.50        | -0.21        | 0.00         | -0.11       |
| 36fin1_2              | 0.15        | 0.28         | 0.18         | -0.18        | 0.00         | -0.05        | 0.35         | 0.00         | -0.04        | 0.22         | -0.05        | 0.21         | 0.23         | 0.33         | 0.09        |
| aspec2_6              | 0.00        | 0.28         | -0.41        | 0.00         | 0.00         | -0.49        | 0.00         | 0.00         | -0.45        | 0.30         | 0.30         | -0.08        | -1.00        | 0.00         | -0.05       |
| 63fin2_3              | 0.00        | 0.26         | 0.18         | -0.05        | 0.00         | 0.34         | 0.36         | 0.55         | 0.18         | 0.37         | 0.50         | 0.21         | 0.33         | 0.33         | 0.24        |
| acc2_4                | 0.00        | 0.19         | 0.00         | 0.19         | 0.00         | 0.73         | 0.00         | 0.37         | -0.37        | 0.00         | 0.00         | -0.20        | -0.15        | 0.32         | 0.08        |
| 25fin2_4              | 0.00        | 0.26         | -0.01        | -0.16        | 0.27         | 0.80         | 0.00         | 0.55         | 0.00         | 0.35         | -0.05        | 0.68         | 0.65         | 0.98         | 0.22        |
| 270fin2_3             | 0.00        | 0.63         | 0.00         | 0.49         | 0.00         | 0.00         | 0.00         | 0.56         | 0.22         | 0.22         | 0.21         | 0.49         | -0.11        | 0.00         | 0.23        |
| 42fin1_2              | 0.00        | 0.44         | -0.26        | -0.05        | 0.11         | -0.14        | 0.00         | 0.16         | -0.02        | 0.16         | 0.23         | 0.10         | -0.13        | 0.07         | 0.06        |
| 44fin2_3              | 0.03        | 0.00         | -0.07        | 0.14         | 0.17         | 0.98         | 0.00         | 0.16         | 0.29         | 0.57         | 0.50         | 0.88         | 0.98         | 1.00         | 0.30        |
| 3202fin1_3            | 0.00        | 0.62         | 0.20         | 0.18         | 0.00         | 0.22         | 0.19         | 0.28         | 0.36         | 0.00         | 0.19         | -0.22        | 0.09         | 0.42         | 0.17        |
| 8029fin6_7            | 0.00        | 0.58         | 0.31         | 0.36         | 0.00         | -0.01        | 0.00         | 0.39         | -0.16        | 0.00         | 0.21         | 0.77         | -0.14        | 0.43         | 0.20        |
| 3006fin1_2            | 0.00        | 0.38         | -0.02        | 0.82         | 0.00         | 0.30         | 0.00         | 0.79         | 0.40         | 0.00         | 0.37         | 0.38         | 0.46         | 0.47         | 0.28        |
| 96fin1_3              | 0.00        | 0.06         | 0.28         | 0.17         | 0.00         | 0.13         | 0.00         | 0.31         | -0.24        | 0.20         | 0.03         | 0.06         | 0.37         | 0.45         | 0.08        |
| 262fin1_2             | 0.21        | 0.70         | 0.41         | 0.61         | 0.16         | 0.17         | 0.00         | 0.18         | 0.09         | -0.03        | 0.26         | 0.58         | 0.51         | 0.28         | 0.28        |
| 3007fin1_2            | 0.14        | 0.27         | -0.08        | -0.02        | 0.00         | 0.40         | 0.18         | 0.20         | 0.30         | 0.00         | 0.44         | 0.27         | 0.38         | 0.41         | 0.17        |
| 3152fin1_2            | 0.00        | 0.36         | -0.15        | 0.22         | 0.00         | 0.34         | 0.00         | 0.32         | -0.14        | 0.32         | -0.28        | -0.01        | -0.15        | 0.00         | 0.08        |
| 8070fin1_3            | 0.03        | 0.39         | -0.62        | -0.21        | 0.00         | -0.39        | 0.00         | 0.17         | -0.05        | 0.74         | 0.20         | 0.00         | -0.20        | 0.00         | 0.02        |
| 3012fin1_2            | 0.00        | -0.10        | -0.29        | -0.55        | 0.00         | 0.28         | 0.18         | 0.65         | -0.06        | 0.44         | 0.31         | 0.14         | -0.18        | 0.00         | 0.08        |
| 40fin2_3              | 0.00        | 0.88         | -0.16        | -0.27        | 0.13         | 0.01         | 0.00         | -0.12        | -0.48        | 0.00         | 0.00         | -0.43        | -0.02        | 1.00         | -0.04       |
| 3136fin1_2            | 0.02        | 0.63         | 0.05         | 0.71         | 0.11         | 0.87         | 0.18         | 0.45         | 0.20         | 0.39         | 0.41         | 0.86         | 0.99         | 1.00         | 0.41        |
| 113fin1_2             | 0.00        | 0.23         | 0.13         | 0.16         | 0.00         | 0.08         | 0.00         | 0.51         | 0.23         | 0.24         | 0.05         | 0.16         | -0.16        | 0.68         | 0.15        |
| 58fin7_9              | 0.00        | 0.00         | -0.13        | -0.22        | 0.27         | -0.03        | 0.00         | 0.41         | -0.11        | 0.24         | 0.20         | 0.18         | 0.34         | 0.36         | 0.07        |
| 3064fin6_7            | 0.39        | 0.30         | 0.26         | 0.08         | 0.00         | -0.18        | 0.17         | 0.60         | 0.15         | 0.14         | -0.29        | 0.44         | -0.38        | 0.25         | 0.17        |
| 3196fin5_6            | 0.13        | 0.34         | -0.19        | 0.07         | 0.21         | 0.25         | 0.13         | 0.08         | 0.47         | 0.39         | 0.55         | -0.10        | -0.05        | 0.26         | 0.19        |
| 69fin2_3              | 0.03        | -0.09        | 0.39         | 0.16         | 0.15         | 0.39         | 0.15         | 0.17         | -0.08        | 0.13         | -0.12        | 0.52         | -0.01        | 0.18         | 0.15        |
| 58fin3_6              | 0.00        | 0.19         | -0.05        | 0.41         | 0.00         | -0.03        | 0.00         | -0.30        | -0.16        | 0.25         | -0.17        | 0.01         | 0.33         | 0.41         | 0.01        |
| 62fin2_3              | 0.13        | 0.34         | 0.14         | 0.36         | 0.00         | 0.12         | 0.17         | 0.41         | -0.16        | 0.51         | 0.48         | -0.07        | 0.85         | 0.36         | 0.20        |
| 8053fin2_3            | 0.00        | 0.38         | 0.33         | -0.02        | 0.00         | 0.12         | 0.00         | 0.26         | 0.15         | 0.36         | 0.38         | 0.52         | 0.19         | -0.07        | 0.21        |
| 247fin1_2             | 0.00        | 0.41         | 0.36         | -0.17        | 0.00         | 0.22         | 0.21         | -0.07        | -0.10        | 0.46         | 0.01         | 0.15         | 0.31         | 0.00         | 0.12        |
| 3114fin1_2            | 0.27        | -0.08        | 0.26         | 0.39         | 0.00         | -0.02        | 0.00         | 0.70         | 0.70         | 0.14         | -0.19        | 0.05         | -0.04        | 0.50         | 0.19        |
| 265fin2_3             | 0.00        | 0.01         | 0.00         | -0.30        | 0.22         | -0.05        | 0.00         | 0.74         | -0.39        | 0.20         | 0.81         | 0.69         | -0.06        | -0.03        | 0.16        |
| 3121fin1_2            | 0.00        | 0.17         | -0.24        | 0.13         | 0.23         | 0.05         | 0.18         | 0.28         | -0.13        | 0.51         | 0.24         | 0.83         | 0.12         | 0.28         | 0.19        |
| 192fin1_2             | 0.00        | 0.23         | -0.08        | -0.01        | 0.00         | -0.27        | 0.30         | 0.18         | -0.32        | 0.71         | 0.22         | 0.42         | -0.01        | 0.51         | 0.11        |
| 3094fin2_3            | 0.27        | 0.00         | 0.00         | -0.13        | 0.22         | 0.23         | 0.21         | -0.21        | -0.22        | 0.36         | 0.48         | -0.21        | -0.07        | 0.00         | 0.08        |
| 8091fin1_2            | 0.00        | 0.49         | -0.01        | 0.96         | 0.00         | 0.12         | 0.00         | 0.52         | 0.09         | 0.58         | -0.06        | 0.01         | 0.06         | 0.10         | 0.23        |
| 166fin2_3             | 0.00        | -0.05        | 0.25         | 0.28         | 0.00         | 0.60         | 0.53         | 0.30         | -0.01        | 0.39         | 0.74         | 0.21         | 0.07         | 0.00         | 0.28        |
| 3017fin1_2            | 0.00        | 0.80         | 0.30         | 0.16         | 0.00         | 0.43         | 0.32         | 0.38         | -0.30        | 0.45         | 0.49         | 0.25         | 0.43         | 0.53         | 0.27        |
| 149fin2_3             | 0.09        | 0.75         | 0.16         | 0.26         | 0.00         | -0.28        | 0.00         | 0.38         | -0.55        | 0.25         | 0.11         | -0.05        | -0.07        | 0.00         | 0.09        |
| aspec11_12            | 0.00        | 0.33         | -0.22        | -0.35        | 0.00         | -0.28        | 0.00         | -0.14        | -0.35        | 0.22         | 0.35         | -0.25        | -0.29        | 0.00         | -0.06       |
| 220fin1_2             | 0.00        | 0.20         | -0.05        | 0.15         | 0.16         | -0.07        | 0.00         | -0.10        | -0.02        | 0.37         | 0.08         | 0.91         | 0.30         | 0.31         | 0.14        |
| 3031fin1_3            | 0.19        | -0.02        | -0.02        | 0.80         | 0.13         | -0.06        | 0.15         | 0.52         | 0.68         | 0.60         | -0.06        | 0.31         | 0.29         | 1.00         | 0.27        |
| 3066fin1_3            | 0.00        | 0.14         | 0.26         | -0.06        | 0.18         | 0.04         | 0.08         | 0.47         | 0.28         | 0.25         | 0.68         | 0.47         | 0.50         | 0.00         | 0.23        |
| EF-1a                 | 0.18        | 0.82         | 0.43         | 0.45         | 0.32         | 0.98         | 0.31         | 0.31         | 0.97         | 0.66         | 0.45         | 0.52         | 0.98         | 1.00         | 0.53        |
| 2F3_4                 | 0.00        | -0.09        | 0.36         | -0.03        | 0.00         | -0.04        | 0.17         | -0.16        | -0.01        | 0.35         | -0.12        | -0.22        | 0.55         | 0.00         | 0.02        |
| 268fin1_2             | 0.02        | 0.40         | 0.17         | 0.00         | 0.00         | 0.17         | 0.02         | 0.29         | -0.11        | 0.32         | 0.18         | 0.09         | 0.35         | 0.41         | 0.13        |
| aspec19_21            | 0.23        | 0.00         | -0.30        | -0.09        | 0.00         | -0.03        | 0.40         | 0.33         | 0.35         | 0.20         | 0.70         | -0.03        | -0.03        | 0.43         | 0.15        |
| 3153fin1_2            | 0.00        | 0.62         | 0.15         | 0.00         | 0.00         | -0.26        | 0.16         | -0.21        | -0.08        | 0.29         | 0.23         | 0.06         | -0.47        | 0.13         | 0.08        |
| 274fin1_2             | 0.00        | 0.49         | 0.08         | -0.10        | 0.00         | -0.15        | 0.00         | -0.02        | -0.53        | 0.39         | -0.06        | 0.13         | -0.01        | 0.47         | 0.02        |
| 109fin1_2             | 0.00        | 0.57         | 0.10         | -0.06        | 0.00         | 0.33         | 0.21         | 0.40         | -0.29        | 0.46         | -0.34        | 0.49         | -0.06        | 0.46         | 0.16        |
| 3196fin1_3            | 0.00        | 0.52         | 0.09         | 0.35         | 0.17         | -0.07        | 0.23         | 0.65         | -0.34        | 0.00         | -0.34        | -0.26        | -0.02        | 0.59         | 0.08        |
| 3070fin4_5            | 0.13        | 0.33         | -0.76        | -0.14        | 0.00         | -0.33        | 0.00         | -0.25        | -0.47        | 0.16         | -0.49        | -0.07        | -0.39        | 0.00         | -0.16       |
| 3031fin4_5            | 0.00        | 0.00         | 0.00         | -0.05        | 0.00         | 1.00         | 0.00         | 0.48         | 0.82         | 0.86         | 0.32         | 0.99         | 1.00         | 1.00         | 0.37        |
| 73fin2_3              | 0.00        | 0.12         | 0.10         | 0.16         | 0.00         | -0.06        | 0.14         | 0.14         | 0.03         | 0.72         | 0.05         | -0.02        | -0.02        | 0.00         | 0.11        |
| EF-2                  | 0.07        | 0.32         | 0.12         | 0.11         | 0.15         | 0.43         | 0.20         | 0.29         | 0.21         | 0.30         | 0.21         | 0.75         | 0.78         | 0.48         | 0.26        |
| 127fin1_2             | 0.00        | 0.74         | -0.35        | -0.01        | 0.00         | 0.00         | 0.20         | 0.74         | 0.03         | 0.11         | 0.58         | -0.02        | -0.05        | 0.00         | 0.17        |
| 6fin2_3               | 0.00        | 0.56         | -0.39        | -0.06        | 0.00         | 0.83         | 0.51         | 0.20         | -0.10        | 0.46         | 0.36         | 0.82         | -0.06        | 0.00         | 0.27        |
| 2F7_8                 | 0.00        | 0.47         | -0.34        | 0.10         | 0.33         | -0.05        | 0.15         | 0.04         | -0.30        | 0.52         | 0.43         | -0.23        | -0.08        | 0.00         | 0.09        |
| 26fin3_4              | 0.00        | 0.11         | -0.01        | 0.15         | 0.28         | 0.06         | 0.31         | 0.56         | 0.00         | 0.49         | -0.20        | -0.04        | 0.45         | 0.49         | 0.14        |
| 3009fin2_3            | 0.04        | -0.01        | -0.02        | -0.13        | 0.00         | -0.12        | 0.00         | 0.00         | -0.79        | 0.55         | -0.29        | -0.05        | 0.32         | 0.33         | -0.07       |
| 226fin1_2             | 0.17        | 0.09         | -0.23        | -0.30        | 0.00         | -0.11        | 0.16         | 0.64         | -0.01        | 0.68         | 0.59         | -0.03        | -0.02        | 0.00         | 0.14        |
| Poll1                 | 0.00        | 0.27         | 0.36         | 0.10         | 0.18         | 0.01         | 0.32         | 0.05         | -0.02        | 0.35         | 0.37         | 0.03         | 0.19         | 0.00         | 0.17        |
| 3055fin2_3            | 0.36        | 0.75         | 0.09         | 0.00         | 0.00         | 0.00         | 0.00         | 0.00         | 0.00         | 0.54         | 0.58         | -0.07        | 0.00         | 0.00         | 0.19        |
| 3059fin1_3            | 0.00        | 0.41         | -0.09        | 0.10         | 0.15         | -0.03        | 0.16         | 0.03         | -0.02        | 0.40         | -0.06        | -0.13        | -0.01        | 0.00         | 0.08        |
| 3089fin1_3            | 0.00        | 0.37         | -0.14        | -0.26        | 0.00         | -0.07        | 0.63         | -0.01        | -0.10        | 0.00         | 0.71         | -0.03        | -0.05        | 0.00         | 0.09        |
| <b>Average</b>        | <b>0.05</b> | <b>0.31</b>  | <b>0.01</b>  | <b>0.08</b>  | <b>0.07</b>  | <b>0.12</b>  | <b>0.12</b>  | <b>0.26</b>  | <b>-0.03</b> | <b>0.34</b>  | <b>0.19</b>  | <b>0.19</b>  | <b>0.13</b>  | <b>0.29</b>  | <b>0.14</b> |
| <b>Number &lt;0</b>   | <b>0</b>    | <b>7</b>     | <b>31</b>    | <b>29</b>    | <b>1</b>     | <b>31</b>    | <b>0</b>     | <b>12</b>    | <b>42</b>    | <b>1</b>     | <b>18</b>    | <b>25</b>    | <b>35</b>    | <b>7</b>     |             |
| <b>Fraction &lt;0</b> | <b>0</b>    | <b>0.104</b> | <b>0.463</b> | <b>0.433</b> | <b>0.015</b> | <b>0.463</b> | <b>0.000</b> | <b>0.179</b> | <b>0.627</b> | <b>0.015</b> | <b>0.269</b> | <b>0.373</b> | <b>0.522</b> | <b>0.104</b> |             |
